# Supplementary material for: An HASApf–redoxin complex causing asymmetric catalytic oxidation via the regenerative formation of a reactive oxygen species
Source: Royal Society of Chemistry journal article supplement (doi:10.1039/c5dt01768h), 2015-01-01
Supplement: c5dt01768h1.pdf [file c5dt01768h1.pdf]

データファイル : 120328\_Sample6\_D01.lcd  
サンプル名 : 120328\_Sample6  
メソッドファイル : Manipulation.lcm  
分析日時 : 2012/03/28 19:04:26  
バックグラウンドデータ :

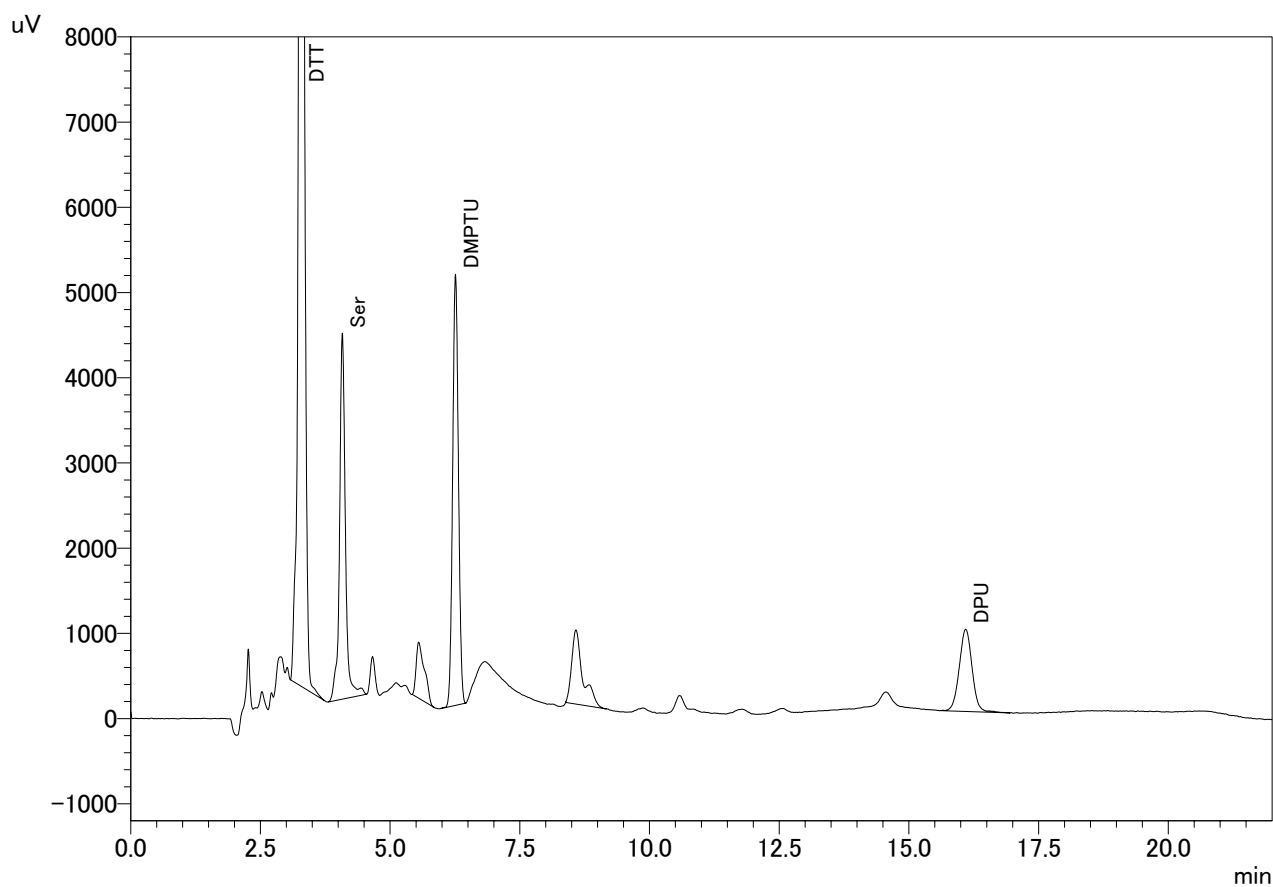

ピークテーブル

検出器A Ch1 269nm

| ピーク# | 化合物名  | 保持時間   | 面積     | 濃度 [pmol] |
|------|-------|--------|--------|-----------|
| 1    | DTT   | 3.277  | 141376 |           |
| 2    | Ser   | 4.076  | 33445  | 47.692    |
| 3    |       | 5.549  | 7265   |           |
| 4    | DMPTU | 6.258  | 39080  |           |
| 5    |       | 8.580  | 12867  |           |
| 6    | DPU   | 16.092 | 16547  |           |
| 合計   |       |        | 250579 |           |

データファイル : 120328\_Sample6\_D02.lcd  
サンプル名 : 120328\_Sample6  
メソッドファイル : 120328\_Sample6.LCM  
分析日時 : 2012/03/28 19:56:27  
バックグラウンドデータ : 120328\_Sample6\_D01.lcd

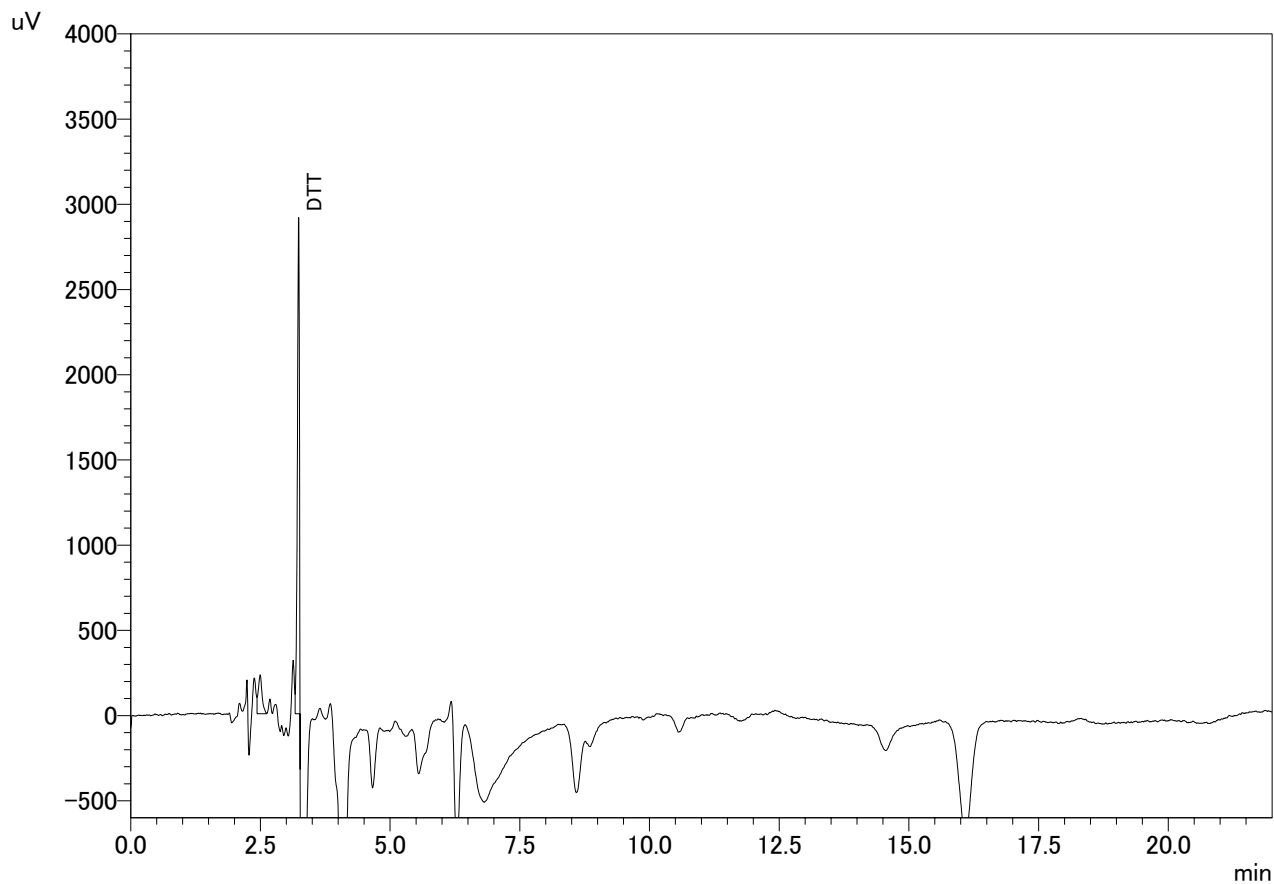

ピークテーブル  
検出器A Ch1 269nm

| ピーク# | 化合物名 | 保持時間  | 面積   | 濃度 [pmol] |
|------|------|-------|------|-----------|
| 1    |      | 2.494 | 1159 |           |
| 2    | DTT  | 3.235 | 7887 |           |
| 合計   |      |       | 9047 |           |

データファイル : 120328\_Sample6\_D03.lcd  
サンプル名 : 120328\_Sample6  
メソッドファイル : Manipulation.lcm  
分析日時 : 2012/03/28 20:48:32  
バックグラウンドデータ : 120328\_Sample6\_D02.lcd

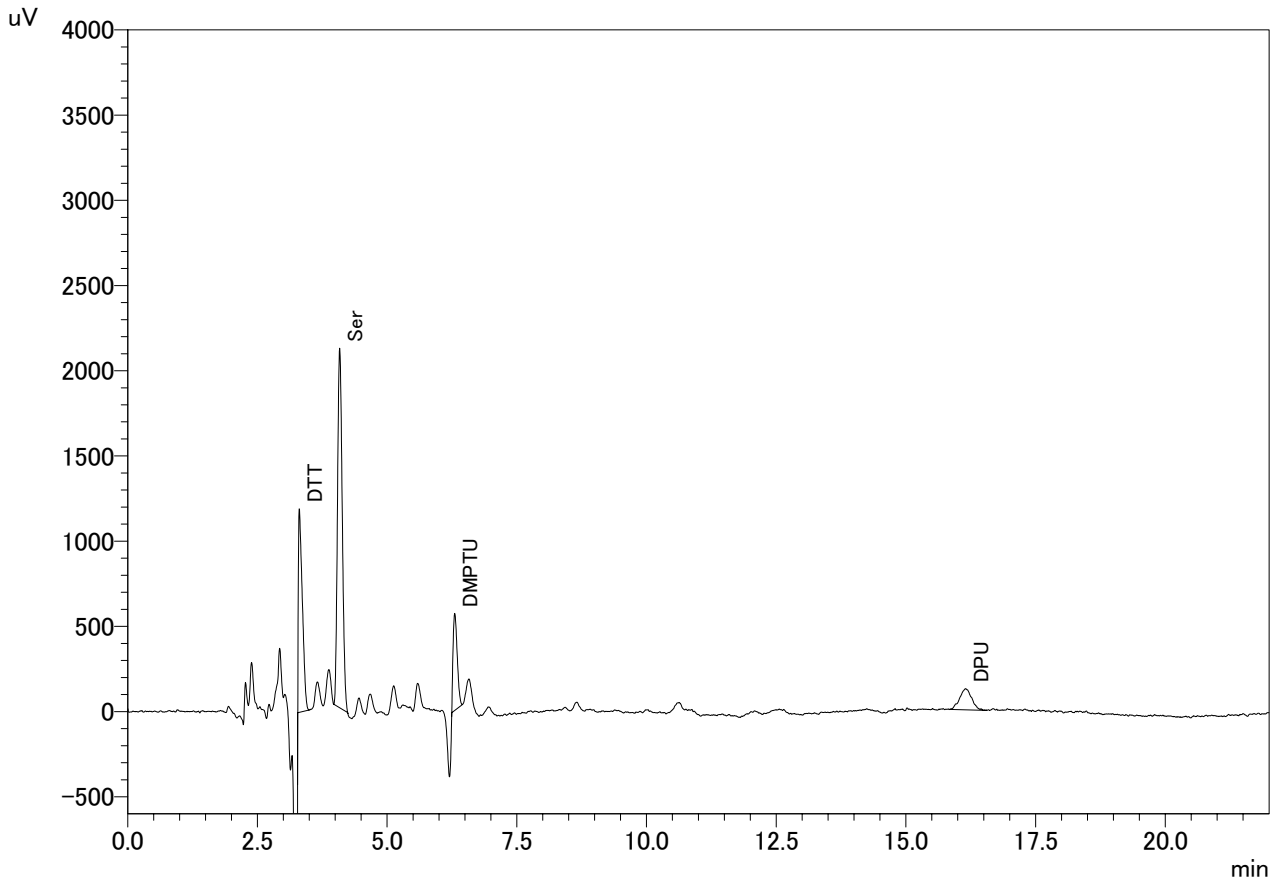

ピークテーブル  
検出器A Ch1 269nm

| ピーク# | 化合物名  | 保持時間   | 面積    | 濃度 [pmol] |
|------|-------|--------|-------|-----------|
| 1    | DTT   | 3.306  | 6326  |           |
| 2    | Ser   | 4.083  | 13369 | 19.064    |
| 3    | DMPTU | 6.301  | 3189  |           |
| 4    | DPU   | 16.147 | 1989  |           |
| 合計   |       |        | 24872 |           |

データファイル : 120328\_Sample6\_D04.lcd  
サンプル名 : 120328\_Sample6  
メソッドファイル : 120328\_Sample6.LCM  
分析日時 : 2012/03/28 21:40:37  
バックグラウンドデータ : 120328\_Sample6\_D03.lcd

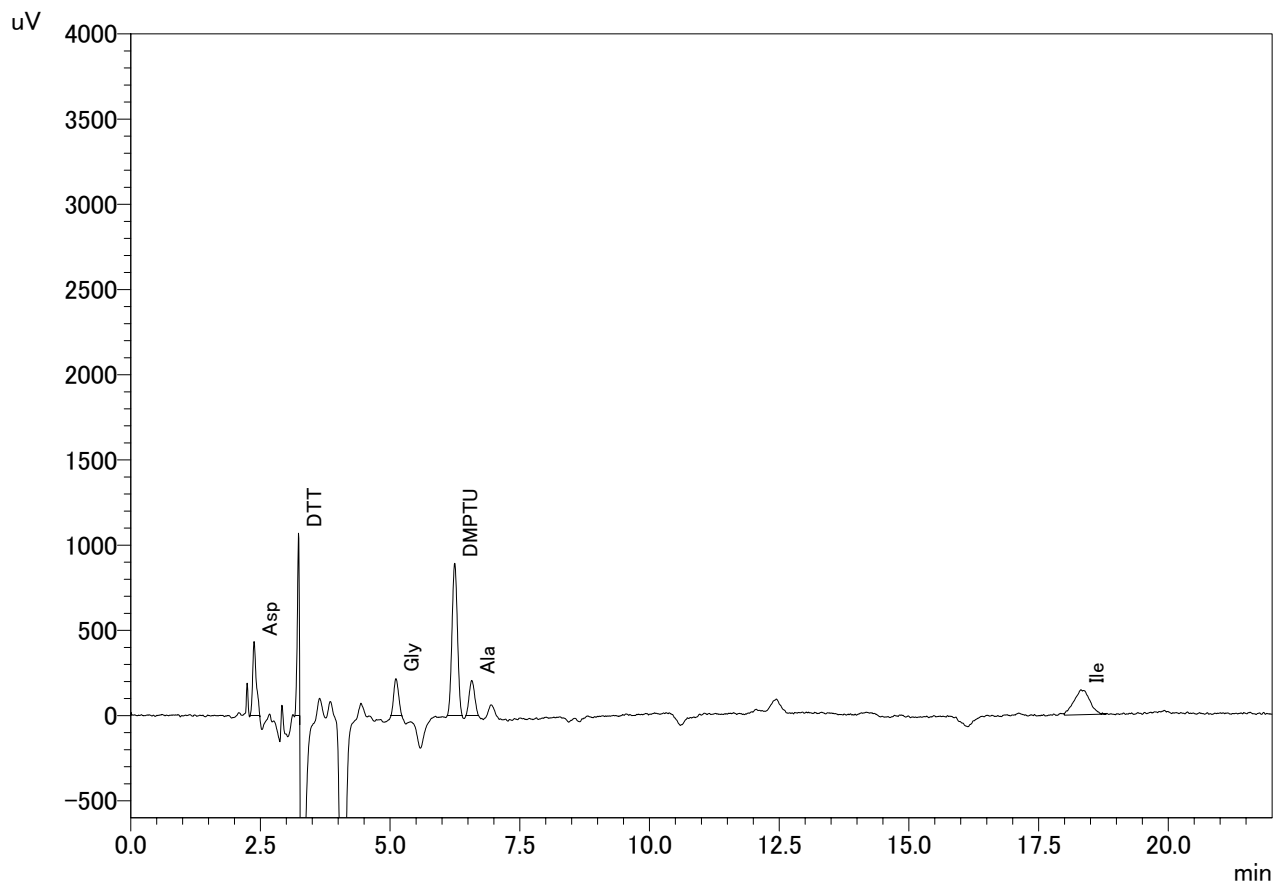

ピークテーブル

検出器A Ch1 269nm

| ピーク# | 化合物名  | 保持時間   | 面積    | 濃度 [pmol] |
|------|-------|--------|-------|-----------|
| 1    | Asp   | 2.376  | 2060  | 2.741     |
| 2    | DTT   | 3.233  | 2774  |           |
| 3    | Gly   | 5.111  | 1375  | 2.154     |
| 4    | DMPTU | 6.243  | 6492  |           |
| 5    | Ala   | 6.571  | 1493  | 2.187     |
| 6    | Ile   | 18.313 | 3095  | 4.434     |
| 合計   |       |        | 17289 |           |

データファイル : 120328\_Sample6\_D05.lcd  
 サンプル名 : 120328\_Sample6  
 メソッドファイル : 120328\_Sample6.LCM  
 分析日時 : 2012/03/28 22:32:41  
 バックグラウンドデータ : 120328\_Sample6\_D04.lcd

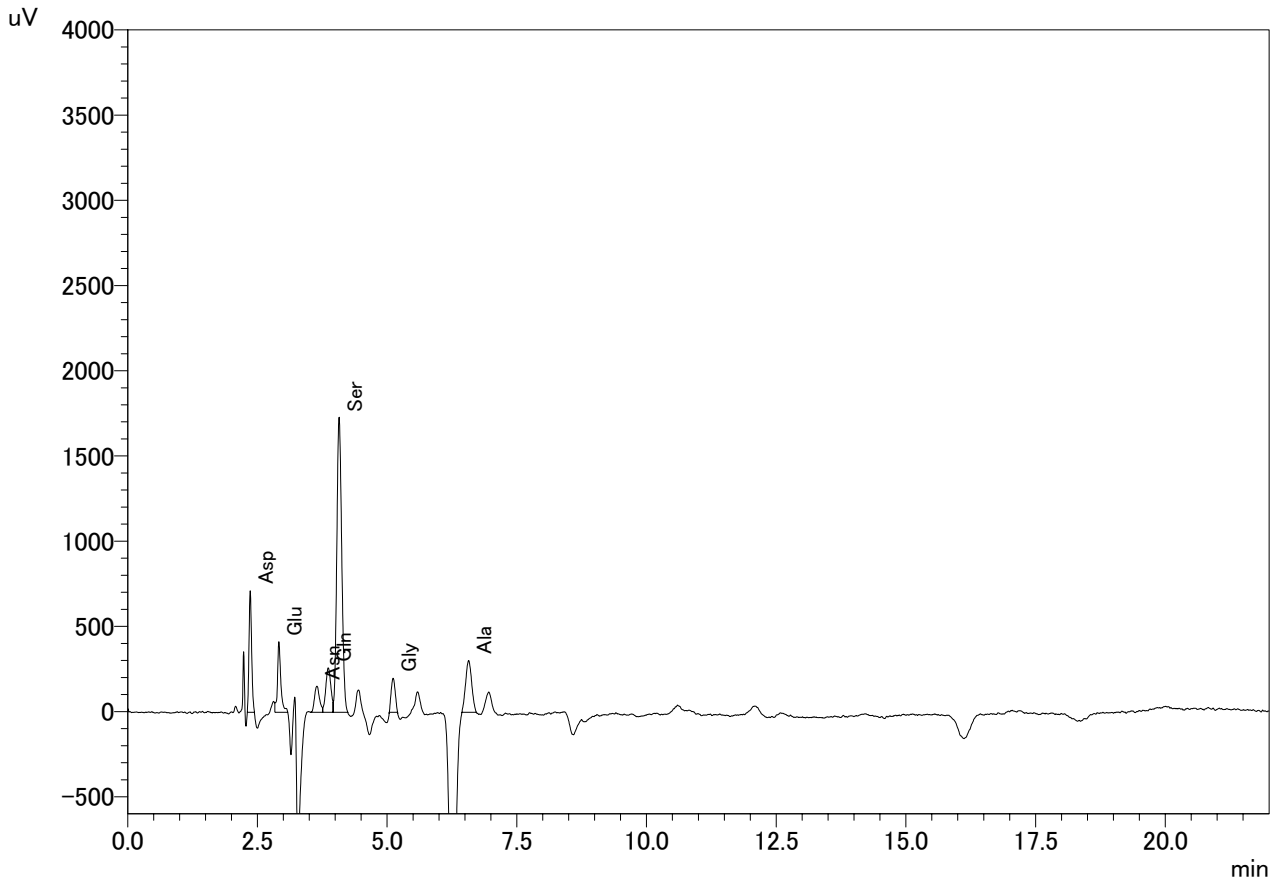

ピークテーブル

検出器A Ch1 269nm

| ピーク# | 化合物名 | 保持時間  | 面積    | 濃度 [pmol] |
|------|------|-------|-------|-----------|
| 1    | Asp  | 2.359 | 2490  | 3.314     |
| 2    | Glu  | 2.912 | 1841  | 2.440     |
| 3    | Asn  | 3.646 | 1023  | 1.324     |
| 4    | Gln  | 3.862 | 1784  | 2.233     |
| 5    | Ser  | 4.072 | 11428 | 16.297    |
| 6    | Gly  | 5.113 | 1073  | 1.681     |
| 7    | Ala  | 6.569 | 2470  | 3.617     |
| 合計   |      |       | 22110 |           |

データファイル : 120328\_Sample6\_D06.lcd  
 サンプル名 : 120328\_Sample6  
 メソッドファイル : 120328\_Sample6.LCM  
 分析日時 : 2012/03/28 23:24:46  
 バックグラウンドデータ : 120328\_Sample6\_D05.lcd

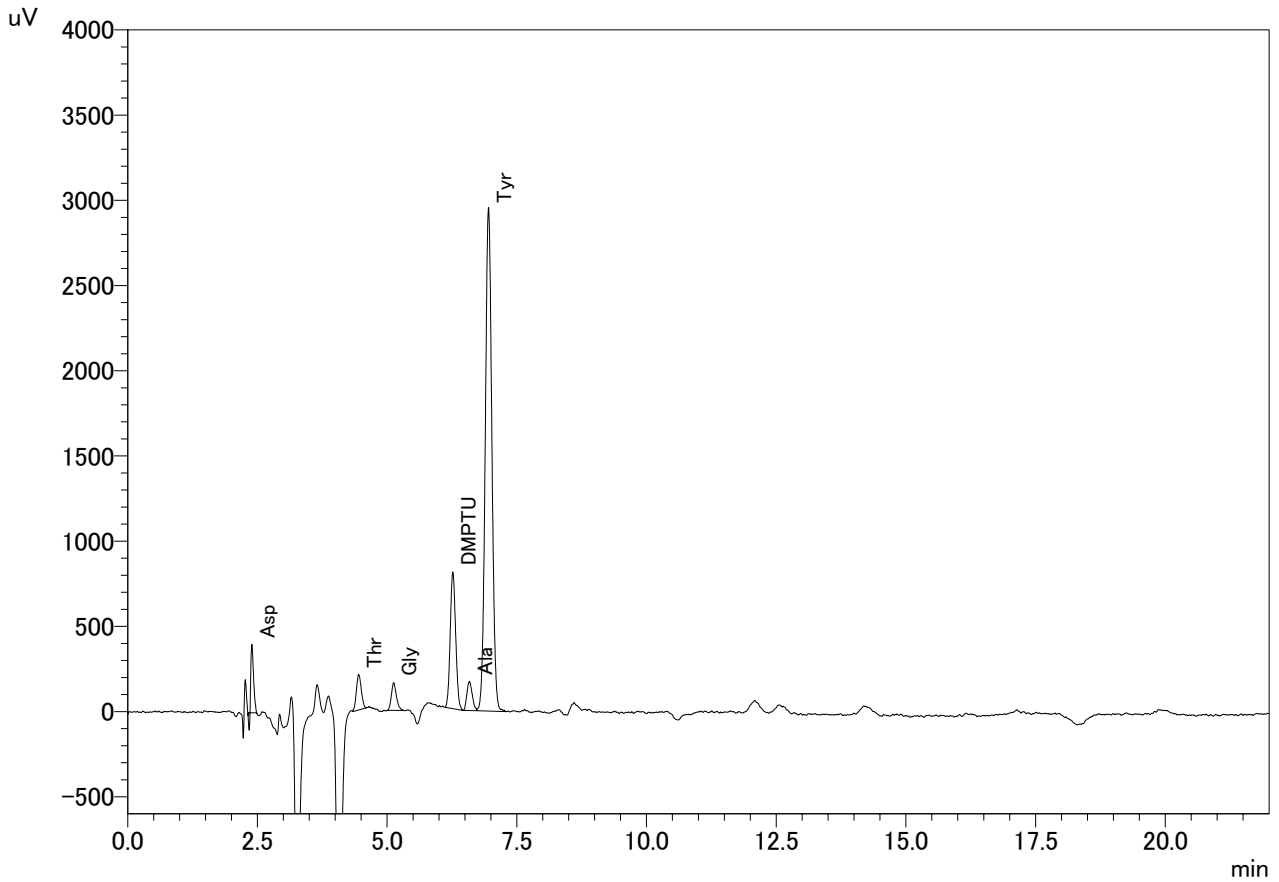

ピークテーブル

検出器A Ch1 269nm

| ピーク# | 化合物名  | 保持時間  | 面積    | 濃度 [pmol] |
|------|-------|-------|-------|-----------|
| 1    | Asp   | 2.391 | 1460  | 1.942     |
| 2    | Thr   | 4.451 | 1380  | 1.857     |
| 3    | Gly   | 5.125 | 1097  | 1.719     |
| 4    | DMPTU | 6.264 | 5864  |           |
| 5    | Ala   | 6.584 | 1229  | 1.800     |
| 6    | Tyr   | 6.952 | 26144 | 38.721    |
| 合計   |       |       | 37173 |           |

データファイル : 120328\_Sample6\_D07.lcd  
サンプル名 : 120328\_Sample6  
メソッドファイル : Manipulation.lcm  
分析日時 : 2012/03/29 0:16:52  
バックグラウンドデータ : 120328\_Sample6\_D06.lcd

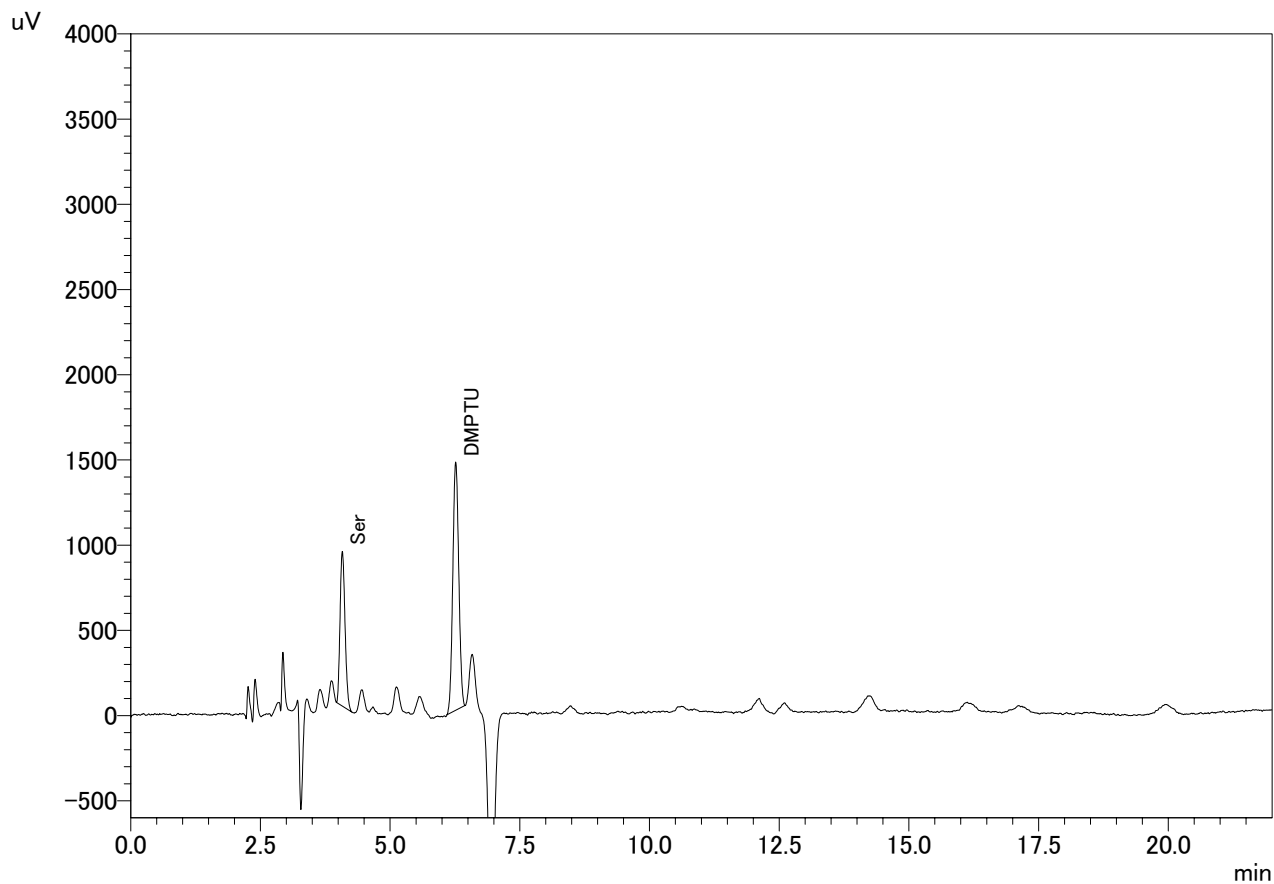

ピークテーブル  
検出器A Ch1 269nm

| ピーク# | 化合物名  | 保持時間  | 面積    | 濃度 [pmol] |
|------|-------|-------|-------|-----------|
| 1    | Ser   | 4.076 | 6038  | 8.610     |
| 2    | DMPTU | 6.262 | 11627 |           |
| 合計   |       |       | 17665 |           |

データファイル : 120328\_Sample6\_D08.lcd  
サンプル名 : 120328\_Sample6  
メソッドファイル : Manipulation.lcm  
分析日時 : 2012/03/29 1:08:58  
バックグラウンドデータ : 120328\_Sample6\_D07.lcd

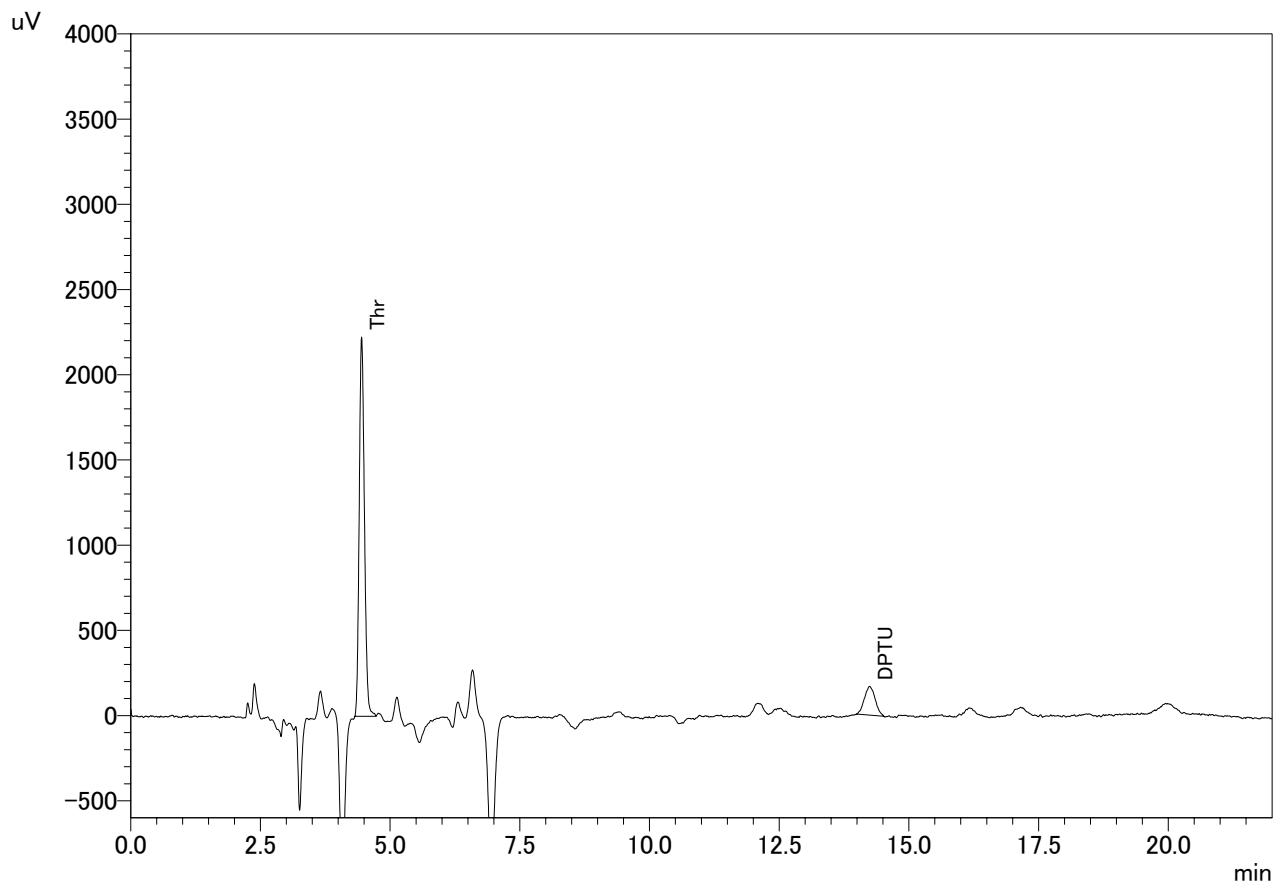

ピークテーブル  
検出器A Ch1 269nm

| ピーク# | 化合物名 | 保持時間   | 面積    | 濃度 [pmol] |
|------|------|--------|-------|-----------|
| 1    | Thr  | 4.448  | 15521 | 20.887    |
| 2    | DPTU | 14.240 | 2423  |           |
| 合計   |      |        | 17944 |           |



データファイル : 120328\_Sample6\_D09.lcd  
 サンプル名 : 120328\_Sample6  
 メソッドファイル : 120328\_Sample6.LCM  
 分析日時 : 2012/03/29 2:01:04  
 バックグラウンドデータ : 120328\_Sample6\_D08.lcd

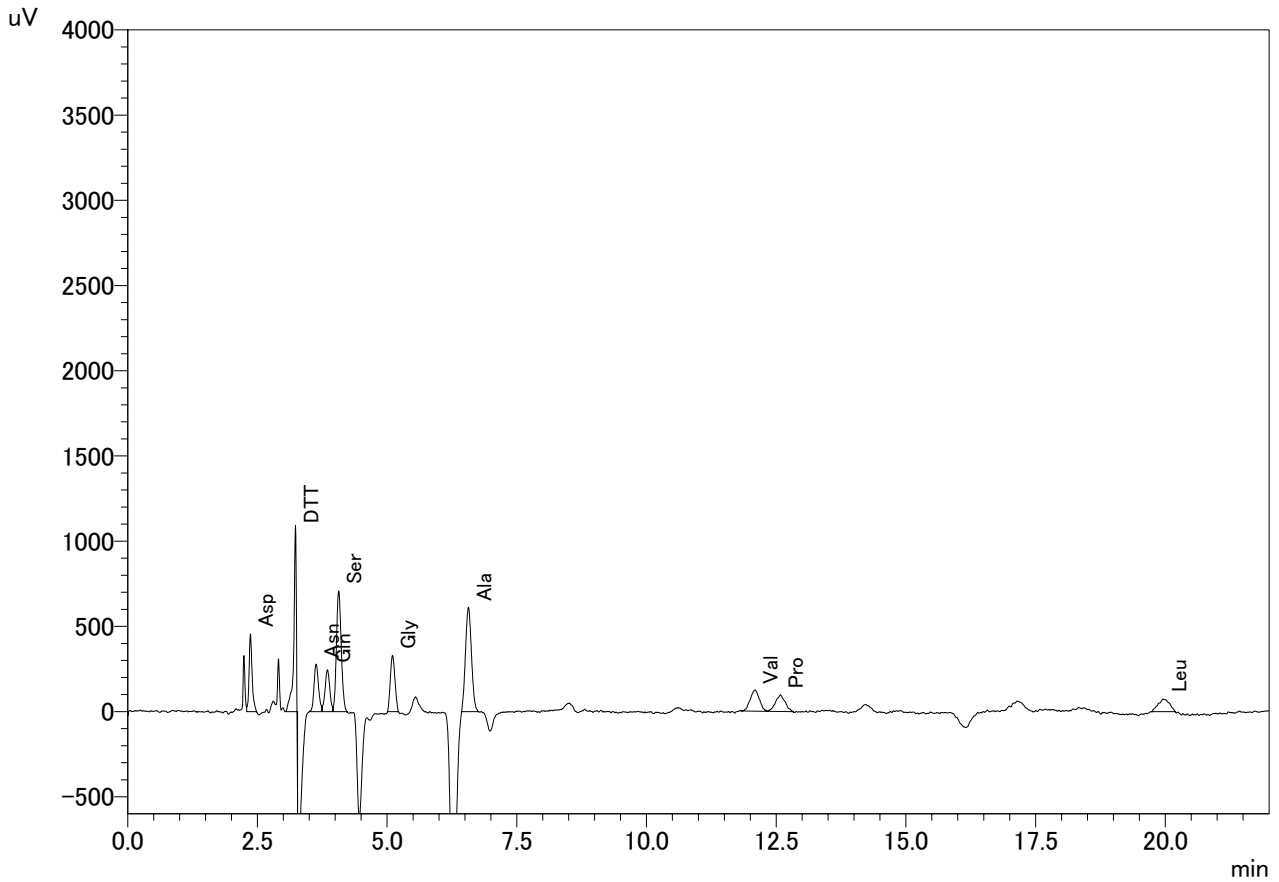

ピークテーブル  
 検出器A Ch1 269nm

| ピーク# | 化合物名 | 保持時間   | 面積    | 濃度 [pmol] |
|------|------|--------|-------|-----------|
| 1    | Asp  | 2.363  | 1835  | 2.442     |
| 2    | DTT  | 3.230  | 3655  |           |
| 3    | Asn  | 3.630  | 1688  | 2.186     |
| 4    | Gln  | 3.848  | 1550  | 1.940     |
| 5    | Ser  | 4.064  | 4577  | 6.526     |
| 6    | Gly  | 5.102  | 2033  | 3.186     |
| 7    | Ala  | 6.565  | 4915  | 7.196     |
| 8    | Val  | 12.091 | 1535  | 2.268     |
| 9    | Pro  | 12.579 | 1250  | 1.964     |
| 10   | Leu  | 19.962 | 1120  | 1.729     |
| 合計   |      |        | 24158 |           |

データファイル : 120328\_Sample6\_D10.lcd  
サンプル名 : 120328\_Sample6  
メソッドファイル : Manipulation.lcm  
分析日時 : 2012/03/29 2:53:08  
バックグラウンドデータ : 120328\_Sample6\_D09.lcd

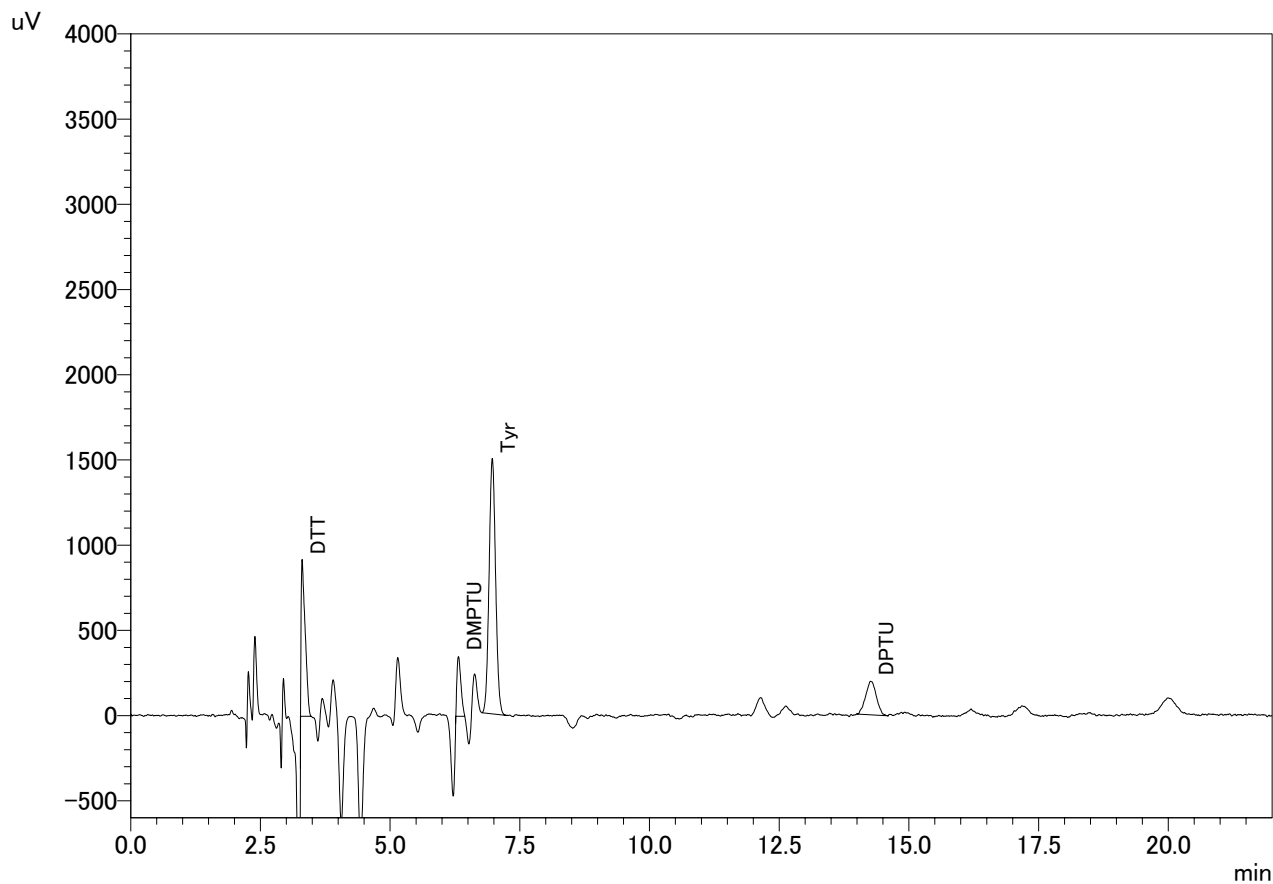

ピークテーブル

検出器A Ch1 269nm

| ピーク# | 化合物名  | 保持時間   | 面積    | 濃度 [pmol] |
|------|-------|--------|-------|-----------|
| 1    | DTT   | 3.302  | 4907  |           |
| 2    | DMPTU | 6.316  | 1872  |           |
| 3    | Tyr   | 6.967  | 13125 | 19.439    |
| 4    | DPTU  | 14.258 | 2820  |           |
| 合計   |       |        | 22724 |           |

データファイル : 120328\_Sample6\_D11.lcd  
 サンプル名 : 120328\_Sample6  
 メソッドファイル : 120328\_Sample6.LCM  
 分析日時 : 2012/03/29 3:45:15  
 バックグラウンドデータ : 120328\_Sample6\_D10.lcd

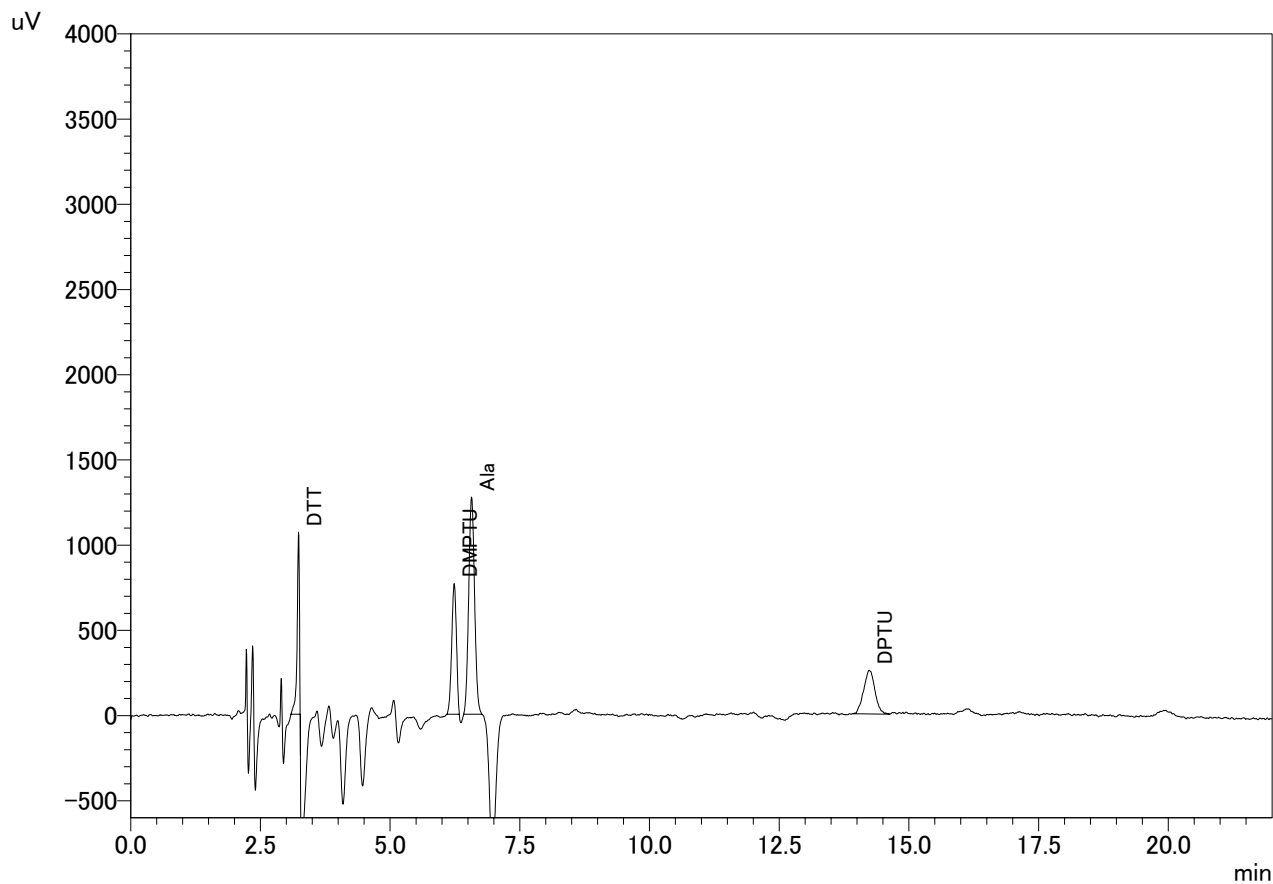

ピークテーブル

検出器A Ch1 269nm

| ピーク# | 化合物名  | 保持時間   | 面積    | 濃度 [pmol] |
|------|-------|--------|-------|-----------|
| 1    | DTT   | 3.233  | 3256  |           |
| 2    | DMPTU | 6.233  | 4828  |           |
| 3    | Ala   | 6.568  | 10042 | 14.703    |
| 4    | DPTU  | 14.231 | 3857  |           |
| 合計   |       |        | 21981 |           |

データファイル : 120328\_Sample6\_D12.lcd  
 サンプル名 : 120328\_Sample6  
 メソッドファイル : 120328\_Sample6.LCM  
 分析日時 : 2012/03/29 4:37:22  
 バックグラウンドデータ : 120328\_Sample6\_D11.lcd

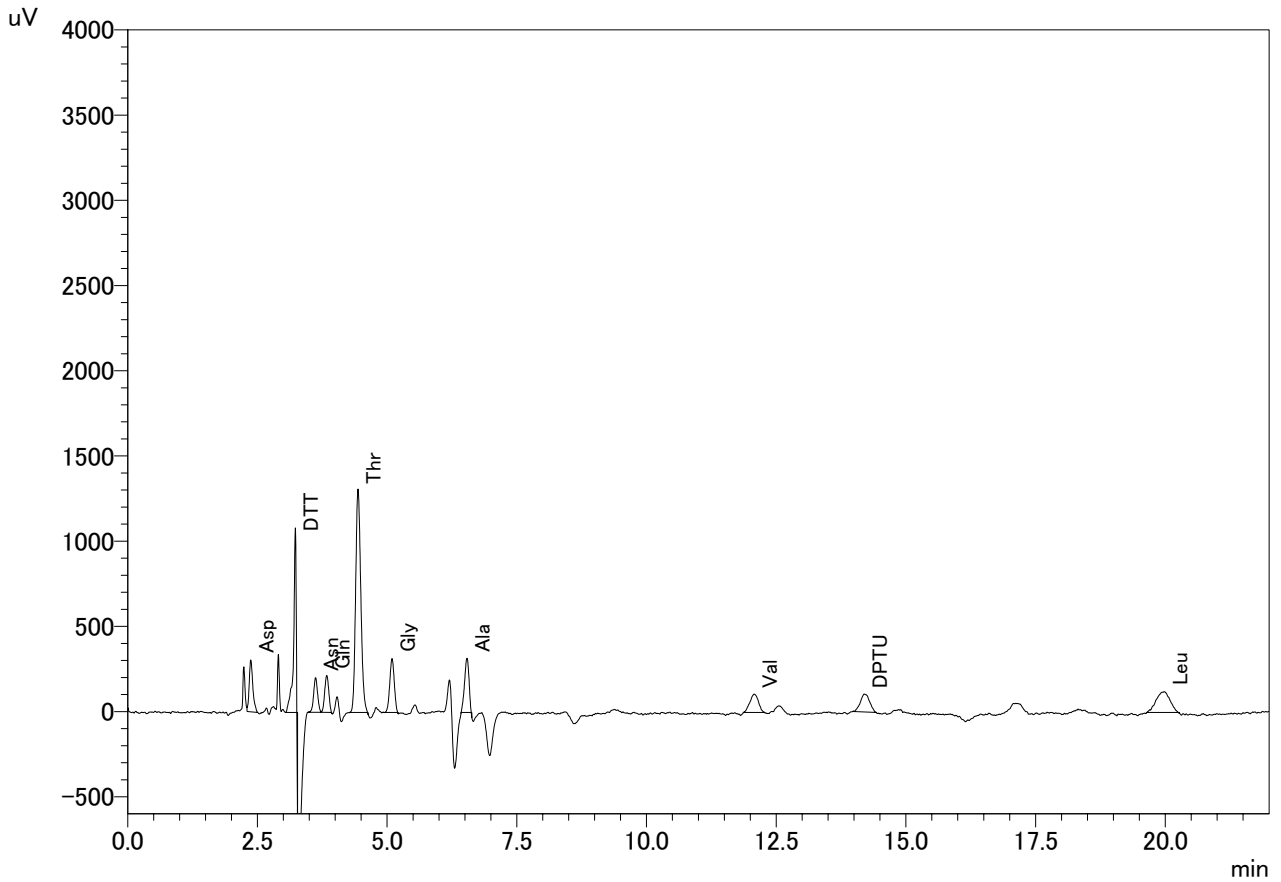

ピークテーブル

検出器A Ch1 269nm

| ピーク# | 化合物名 | 保持時間   | 面積    | 濃度 [pmol] |
|------|------|--------|-------|-----------|
| 1    | Asp  | 2.370  | 1467  | 1.952     |
| 2    | DTT  | 3.227  | 3695  |           |
| 3    | Asn  | 3.619  | 1074  | 1.390     |
| 4    | Gln  | 3.834  | 1181  | 1.478     |
| 5    | Thr  | 4.437  | 9066  | 12.200    |
| 6    | Gly  | 5.093  | 1902  | 2.980     |
| 7    | Ala  | 6.537  | 1890  | 2.767     |
| 8    | Val  | 12.073 | 1234  | 1.824     |
| 9    | DPTU | 14.195 | 1312  |           |
| 10   | Leu  | 19.980 | 2261  | 3.493     |
| 合計   |      |        | 25082 |           |

データファイル : 120328\_Sample6\_D13.lcd  
 サンプル名 : 120328\_Sample6  
 メソッドファイル : Manipulation.lcm  
 分析日時 : 2012/03/29 5:29:27  
 バックグラウンドデータ : 120328\_Sample6\_D12.lcd

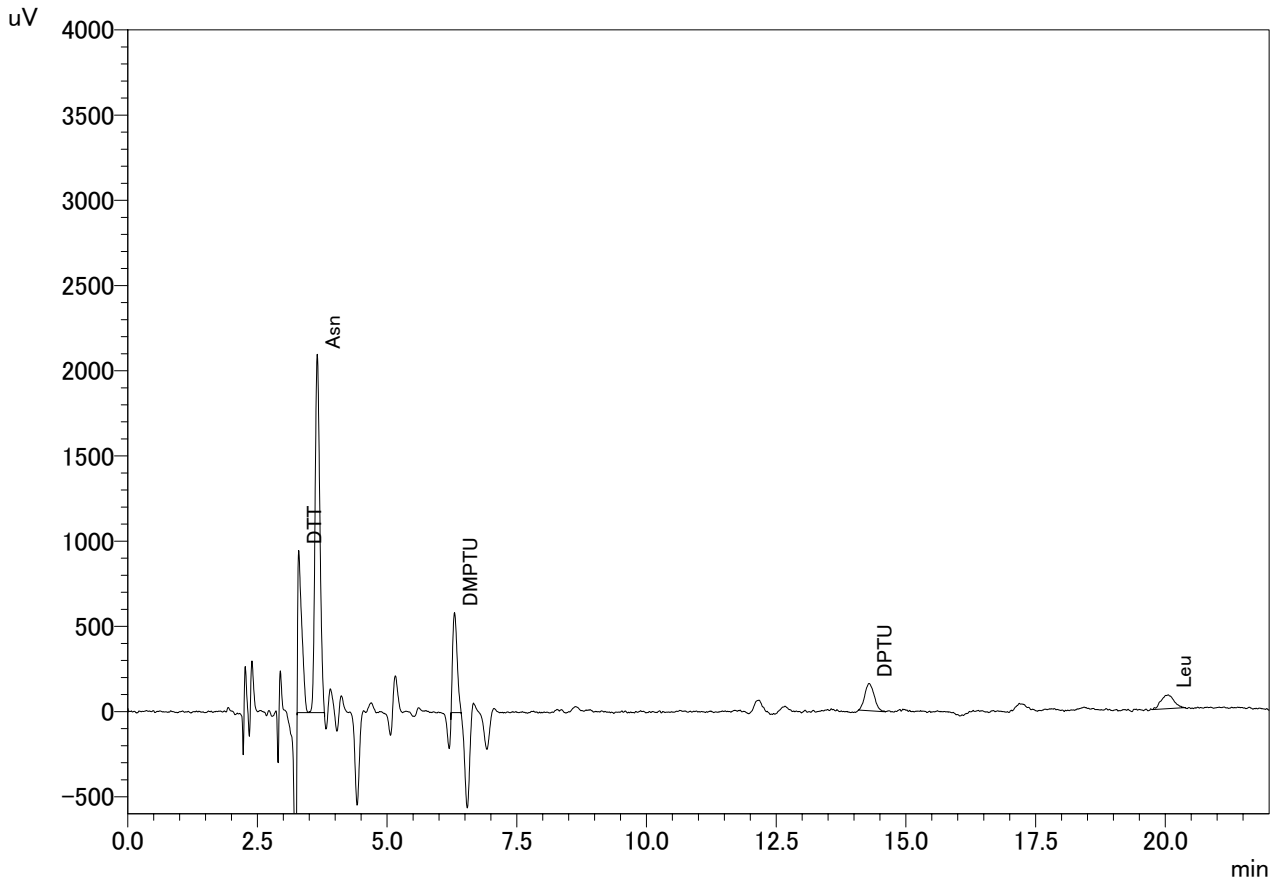

ピークテーブル  
 検出器A Ch1 269nm

| ピーク# | 化合物名  | 保持時間   | 面積    | 濃度 [pmol] |
|------|-------|--------|-------|-----------|
| 1    | DTT   | 3.294  | 5116  |           |
| 2    | Asn   | 3.651  | 13557 | 17.552    |
| 3    | DMPTU | 6.298  | 3502  |           |
| 4    | DPTU  | 14.286 | 2019  |           |
| 5    | Leu   | 20.054 | 1418  | 2.190     |
| 合計   |       |        | 25611 |           |

データファイル : 120328\_Sample6\_D14.lcd  
 サンプル名 : 120328\_Sample6  
 メソッドファイル : Manipulation.lcm  
 分析日時 : 2012/03/29 6:21:34  
 バックグラウンドデータ : 120328\_Sample6\_D13.lcd

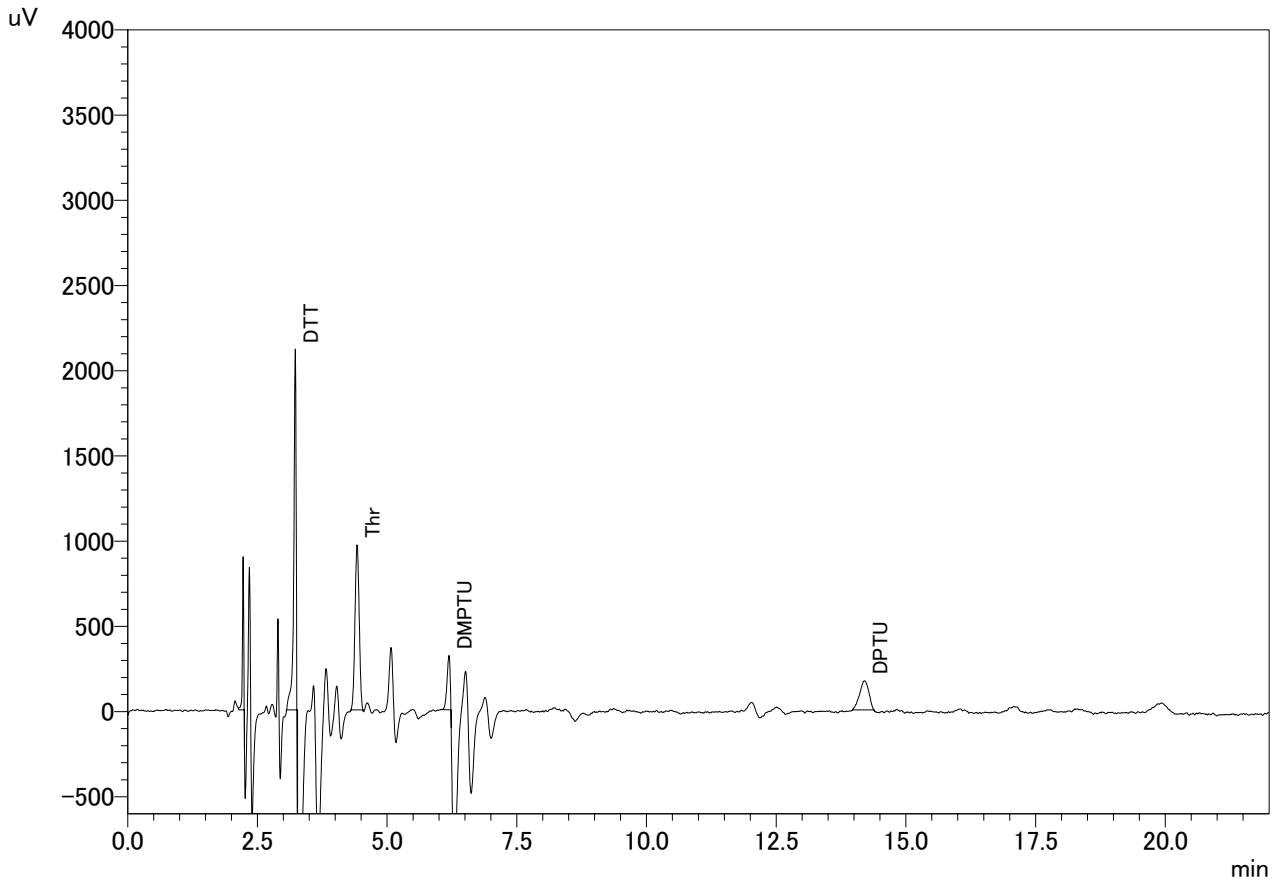

ピークテーブル  
 検出器A Ch1 269nm

| ピーク# | 化合物名  | 保持時間   | 面積    | 濃度 [pmol] |
|------|-------|--------|-------|-----------|
| 1    |       | 2.223  | 1483  |           |
| 2    | DTT   | 3.228  | 6704  |           |
| 3    | Thr   | 4.419  | 5480  | 7.375     |
| 4    | DMPTU | 6.190  | 1299  |           |
| 5    | DPTU  | 14.199 | 2100  |           |
| 合計   |       |        | 17066 |           |

データファイル : 120328\_Sample6\_D15.lcd  
サンプル名 : 120328\_Sample6  
メソッドファイル : Manipulation.lcm  
分析日時 : 2012/03/29 7:13:40  
バックグラウンドデータ : 120328\_Sample6\_D14.lcd

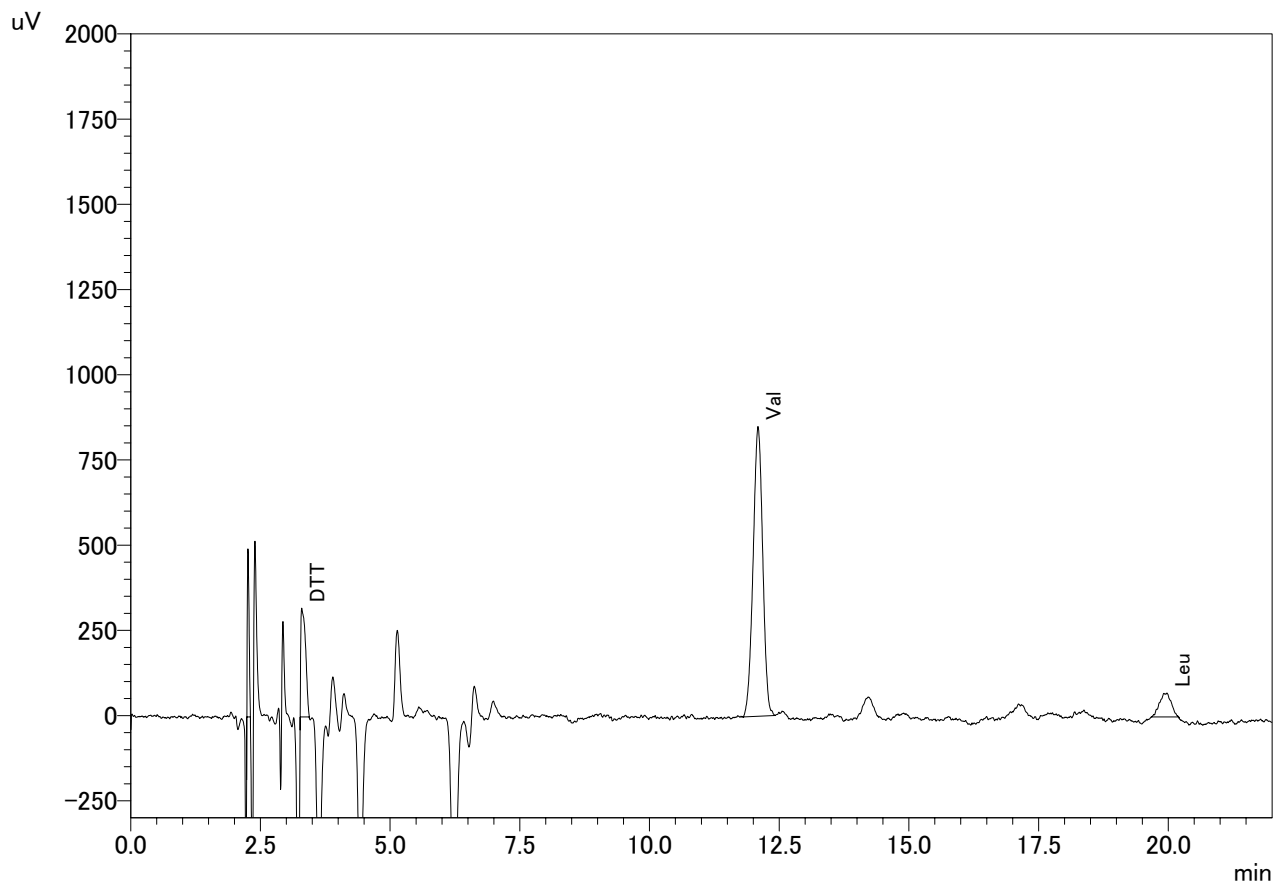

ピークテーブル

検出器A Ch1 269nm

| ピーク# | 化合物名 | 保持時間   | 面積    | 濃度 [pmol] |
|------|------|--------|-------|-----------|
| 1    |      | 2.258  | 1159  |           |
| 2    | DTT  | 3.294  | 2041  |           |
| 3    | Val  | 12.089 | 10952 | 16.186    |
| 4    | Leu  | 19.972 | 1092  | 1.687     |
| 合計   |      |        | 15244 |           |

データファイル : 120328\_Sample6\_D16.lcd  
 サンプル名 : 120328\_Sample6  
 メソッドファイル : 120328\_Sample6.LCM  
 分析日時 : 2012/03/29 8:05:46  
 バックグラウンドデータ : 120328\_Sample6\_D15.lcd

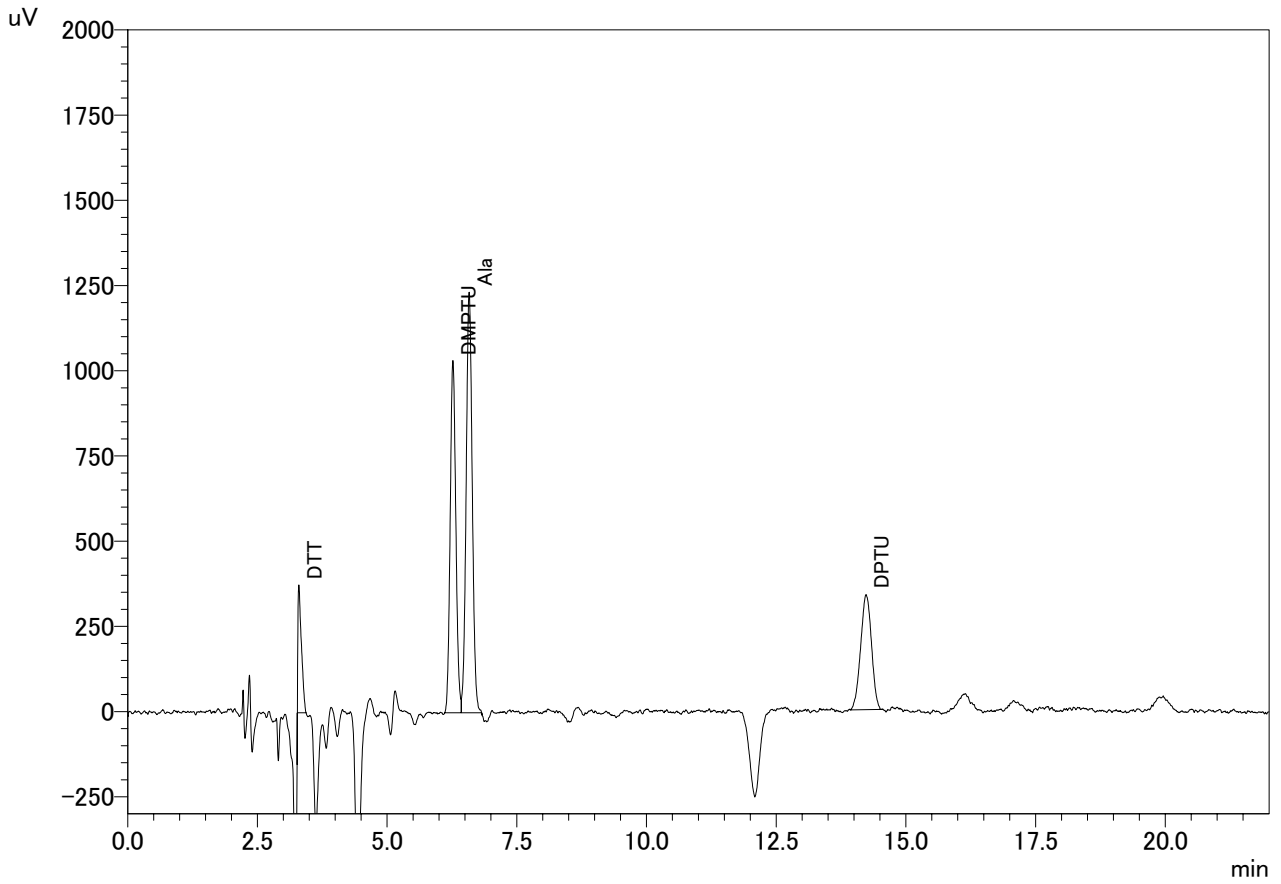

ピークテーブル  
 検出器A Ch1 269nm

| ピーク# | 化合物名  | 保持時間   | 面積    | 濃度 [pmol] |
|------|-------|--------|-------|-----------|
| 1    | DTT   | 3.296  | 1748  |           |
| 2    | DMPTU | 6.266  | 7853  |           |
| 3    | Ala   | 6.579  | 10039 | 14.700    |
| 4    | DPTU  | 14.229 | 4906  |           |
| 合計   |       |        | 24545 |           |



データファイル : 120328\_Sample6\_D17.lcd  
サンプル名 : 120328\_Sample6  
メソッドファイル : 120328\_Sample6.LCM  
分析日時 : 2012/03/29 8:57:52  
バックグラウンドデータ : 120328\_Sample6\_D16.lcd

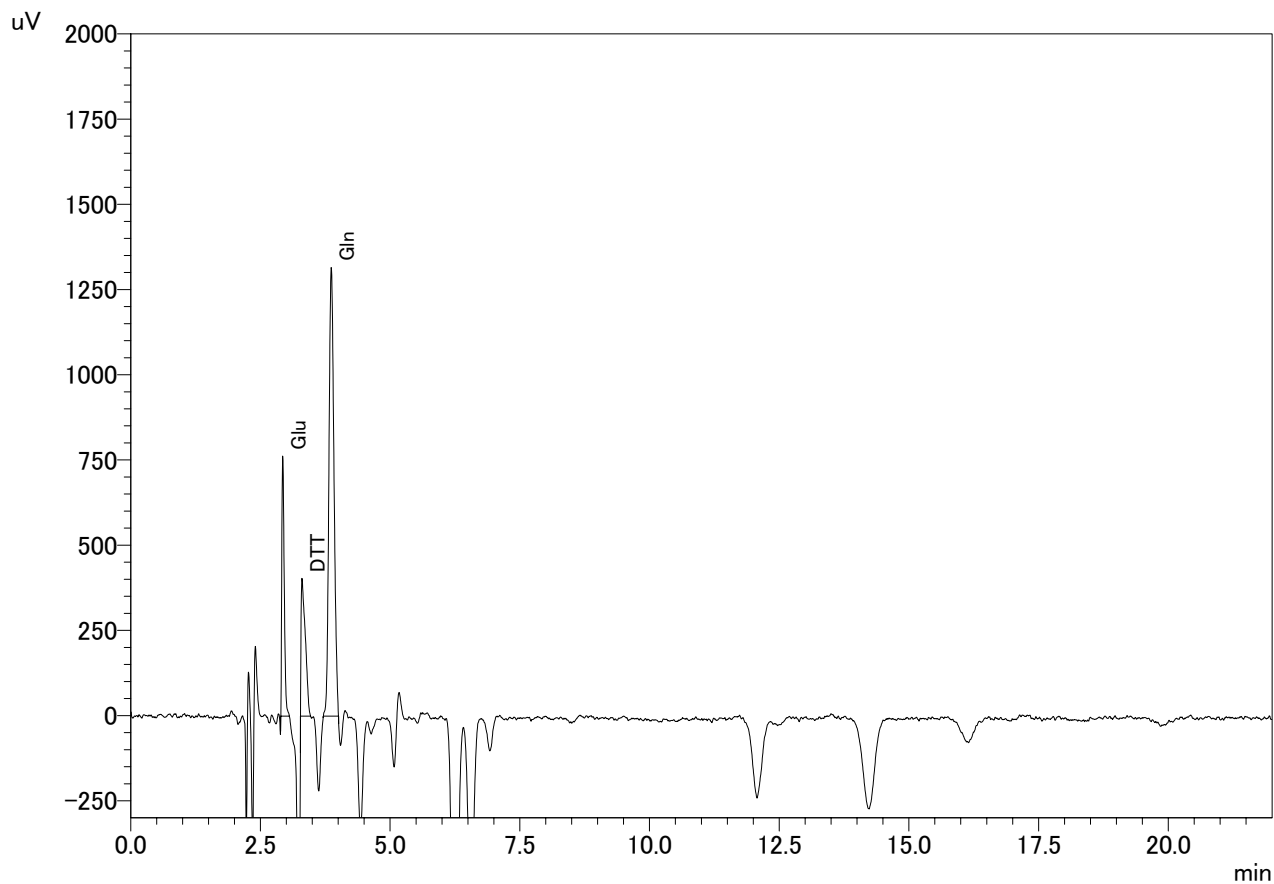

ピークテーブル

検出器A Ch1 269nm

| ピーク# | 化合物名 | 保持時間  | 面積    | 濃度 [pmol] |
|------|------|-------|-------|-----------|
| 1    | Glu  | 2.928 | 2505  | 3.318     |
| 2    | DTT  | 3.300 | 2283  |           |
| 3    | Gln  | 3.864 | 8863  | 11.093    |
| 合計   |      |       | 13651 |           |

データファイル : 120328\_Sample6\_D18.lcd  
 サンプル名 : 120328\_Sample6  
 メソッドファイル : Manipulation.lcm  
 分析日時 : 2012/03/29 9:49:58  
 バックグラウンドデータ : 120328\_Sample6\_D17.lcd

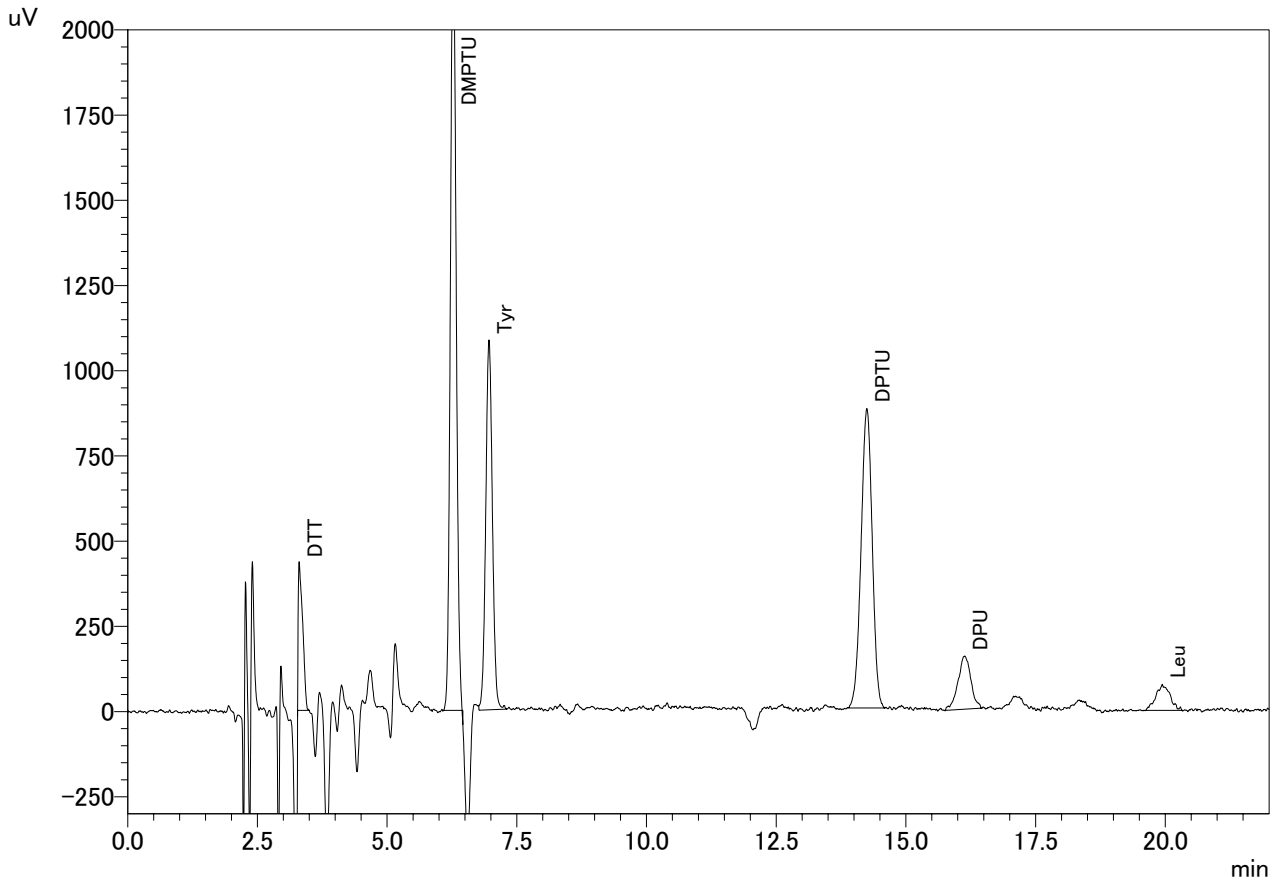

ピークテーブル

検出器A Ch1 269nm

| ピーク# | 化合物名  | 保持時間   | 面積    | 濃度 [pmol] |
|------|-------|--------|-------|-----------|
| 1    | DTT   | 3.302  | 2577  |           |
| 2    | DMPTU | 6.270  | 17870 |           |
| 3    | Tyr   | 6.962  | 9623  | 14.252    |
| 4    | DPTU  | 14.245 | 13133 |           |
| 5    | DPU   | 16.128 | 2696  |           |
| 6    | Leu   | 19.936 | 1443  | 2.229     |
| 合計   |       |        | 47343 |           |

データファイル : 120328\_Sample6\_D19.lcd  
サンプル名 : 120328\_Sample6  
メソッドファイル : Manipulation.lcm  
分析日時 : 2012/03/29 10:42:06  
バックグラウンドデータ : 120328\_Sample6\_D18.lcd

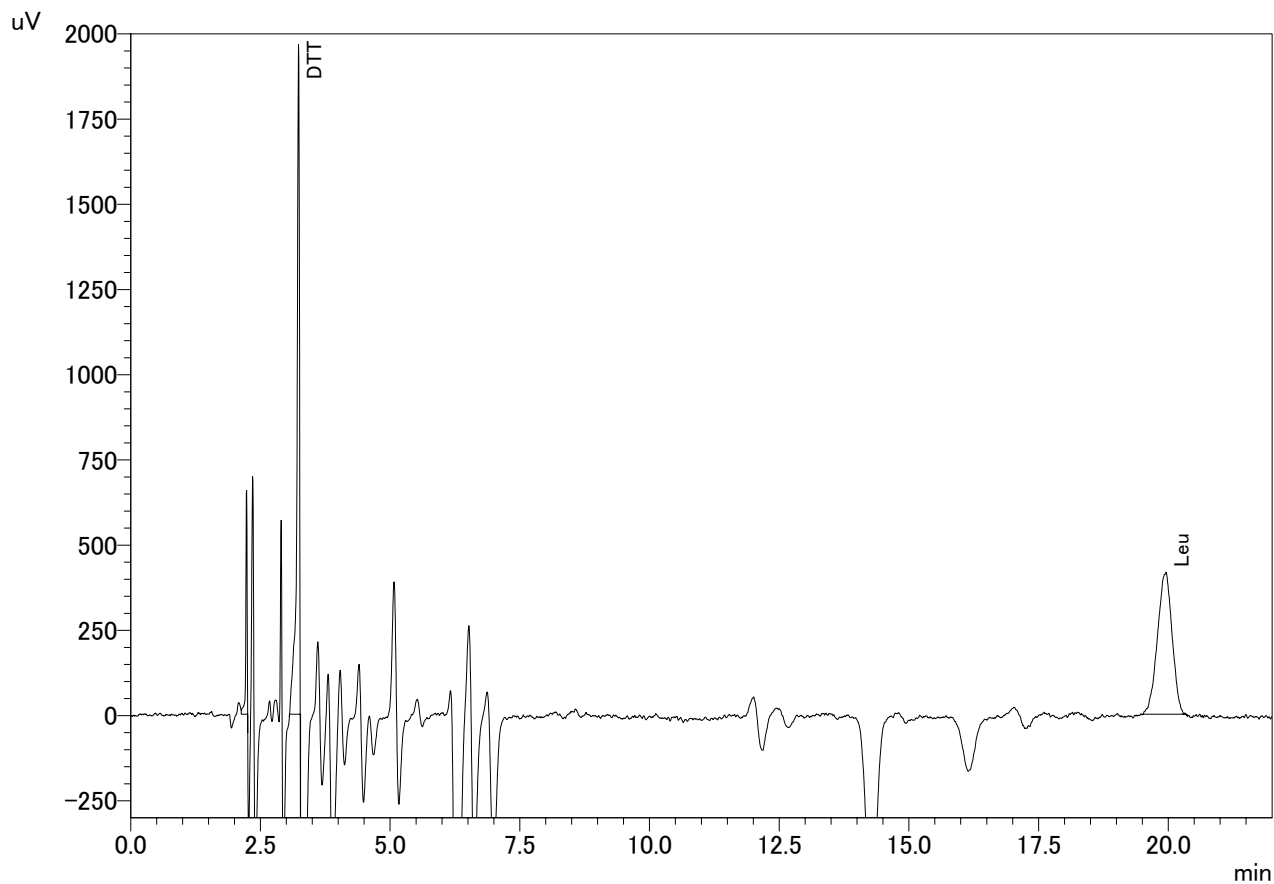

ピークテーブル  
検出器A Ch1 269nm

| ピーク# | 化合物名 | 保持時間   | 面積    | 濃度 [pmol] |
|------|------|--------|-------|-----------|
| 1    |      | 2.230  | 1150  |           |
| 2    | DTT  | 3.233  | 6650  |           |
| 3    | Leu  | 19.950 | 8138  | 12.571    |
| 合計   |      |        | 15938 |           |

データファイル : 120328\_Sample6\_D20.lcd  
サンプル名 : 120328\_Sample6  
メソッドファイル : Manipulation.lcm  
分析日時 : 2012/03/29 11:34:12  
バックグラウンドデータ : 120328\_Sample6\_D19.lcd

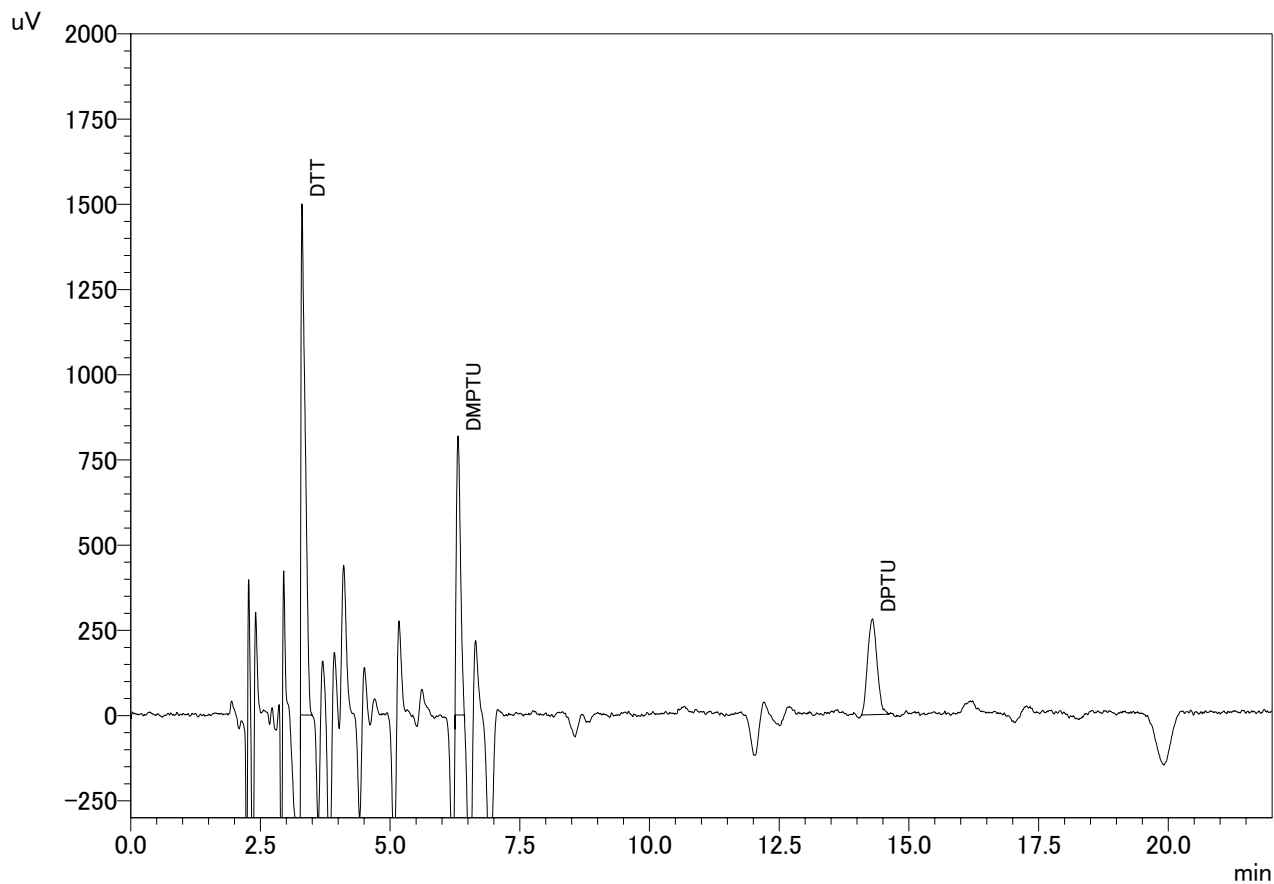

ピークテーブル  
検出器A Ch1 269nm

| ピーク# | 化合物名  | 保持時間   | 面積    | 濃度 [pmol] |
|------|-------|--------|-------|-----------|
| 1    | DTT   | 3.299  | 8378  |           |
| 2    | DMPTU | 6.307  | 4588  |           |
| 3    | DPTU  | 14.295 | 3546  |           |
| 合計   |       |        | 16513 |           |

データファイル : 120328\_Sample6\_D21.lcd  
サンプル名 : 120328\_Sample6  
メソッドファイル : 120328\_Sample6.LCM  
分析日時 : 2012/03/29 12:26:20  
バックグラウンドデータ : 120328\_Sample6\_D20.lcd

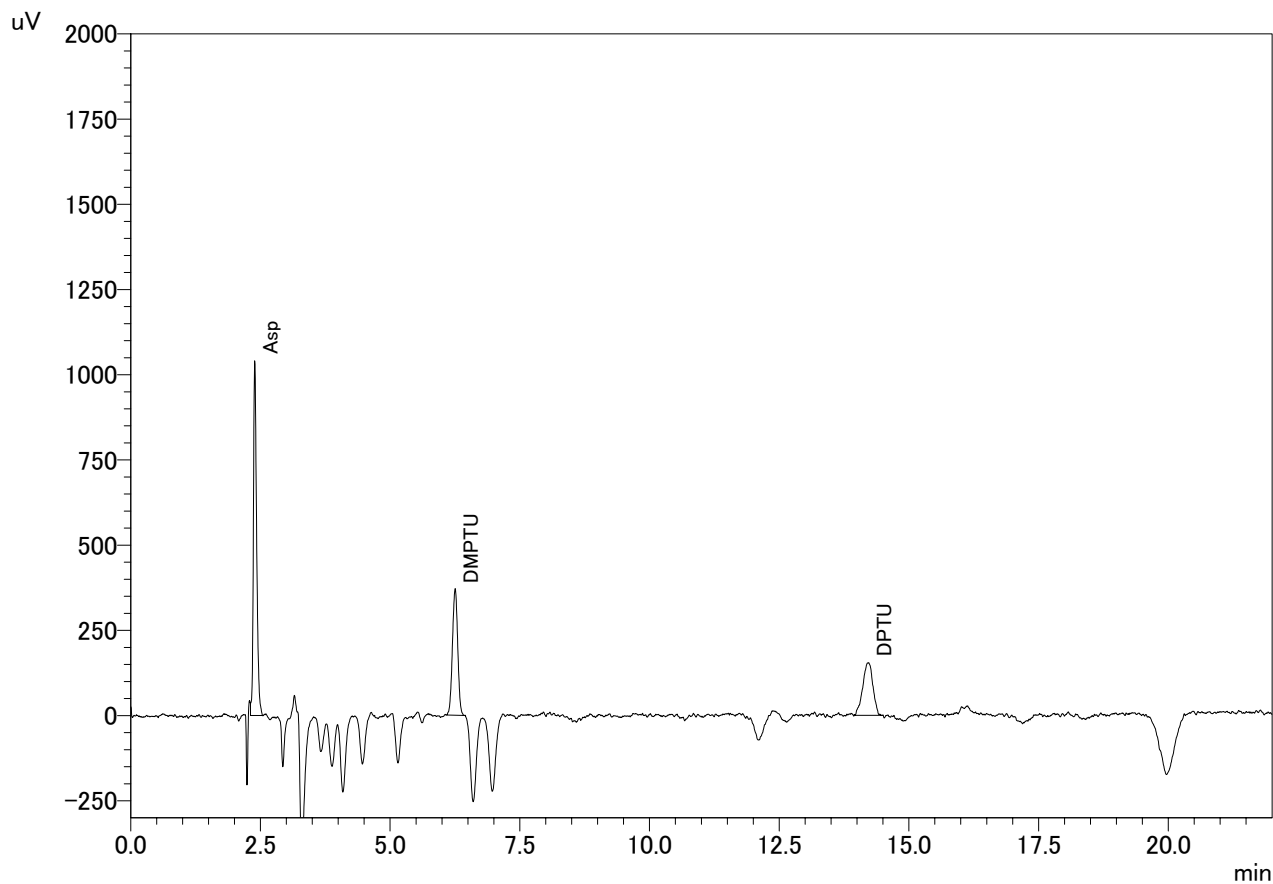

ピークテーブル  
検出器A Ch1 269nm

| ピーク# | 化合物名  | 保持時間   | 面積   | 濃度 [pmol] |
|------|-------|--------|------|-----------|
| 1    | Asp   | 2.389  | 4514 | 6.007     |
| 2    | DMPTU | 6.252  | 2628 |           |
| 3    | DPTU  | 14.219 | 2099 |           |
| 合計   |       |        | 9242 |           |

データファイル : 120328\_Sample6\_D22.lcd  
 サンプル名 : 120328\_Sample6  
 メソッドファイル : Manipulation.lcm  
 分析日時 : 2012/03/29 13:18:27  
 バックグラウンドデータ : 120328\_Sample6\_D21.lcd

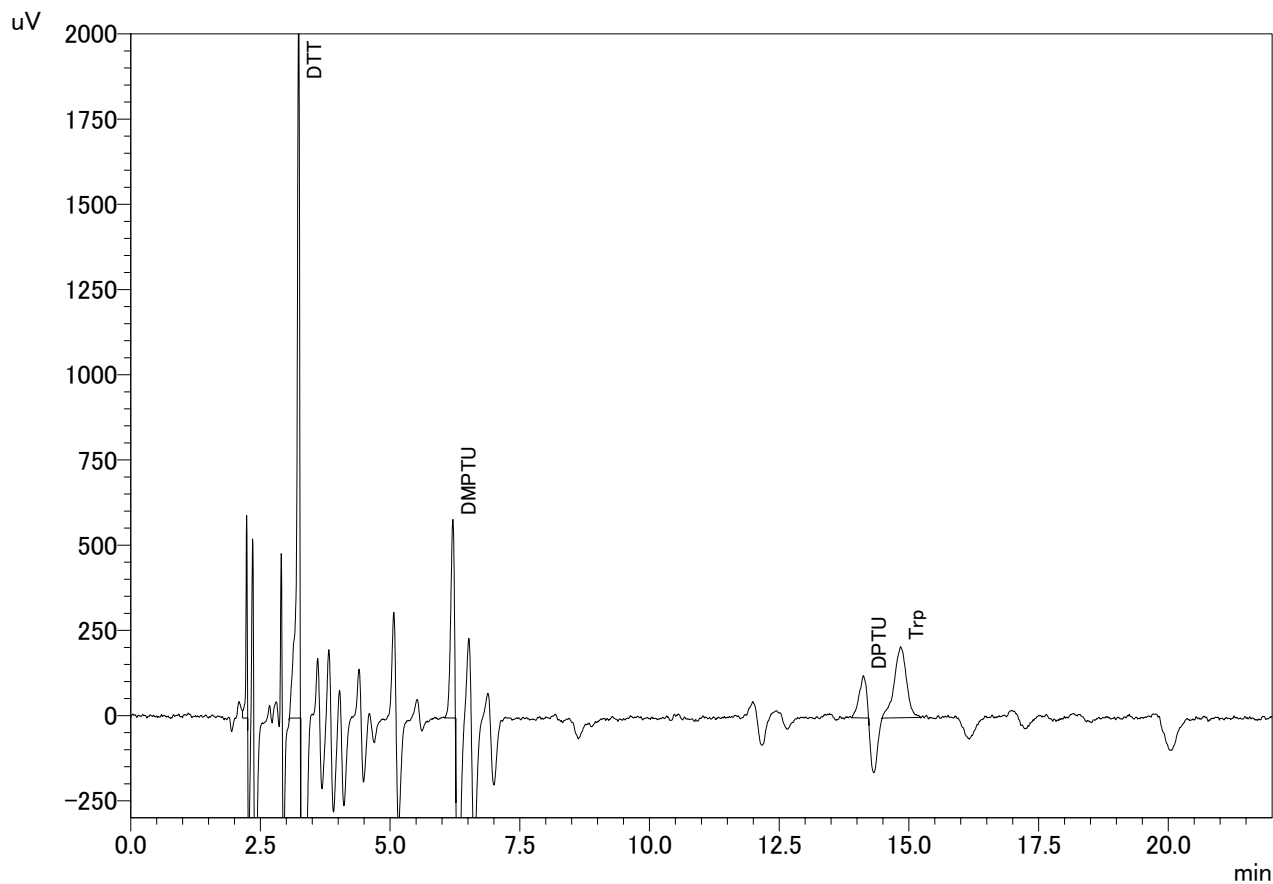

ピークテーブル  
 検出器A Ch1 269nm

| ピーク# | 化合物名  | 保持時間   | 面積    | 濃度 [pmol] |
|------|-------|--------|-------|-----------|
| 1    |       | 2.233  | 1003  |           |
| 2    | DTT   | 3.233  | 7450  |           |
| 3    | DMPTU | 6.207  | 2785  |           |
| 4    | DPTU  | 14.121 | 1194  |           |
| 5    | Trp   | 14.838 | 3409  | 4.898     |
| 合計   |       |        | 15841 |           |

データファイル : 120328\_Sample6\_D23.lcd  
 サンプル名 : 120328\_Sample6  
 メソッドファイル : 120328\_Sample6.LCM  
 分析日時 : 2012/03/29 14:10:33  
 バックグラウンドデータ : 120328\_Sample6\_D22.lcd

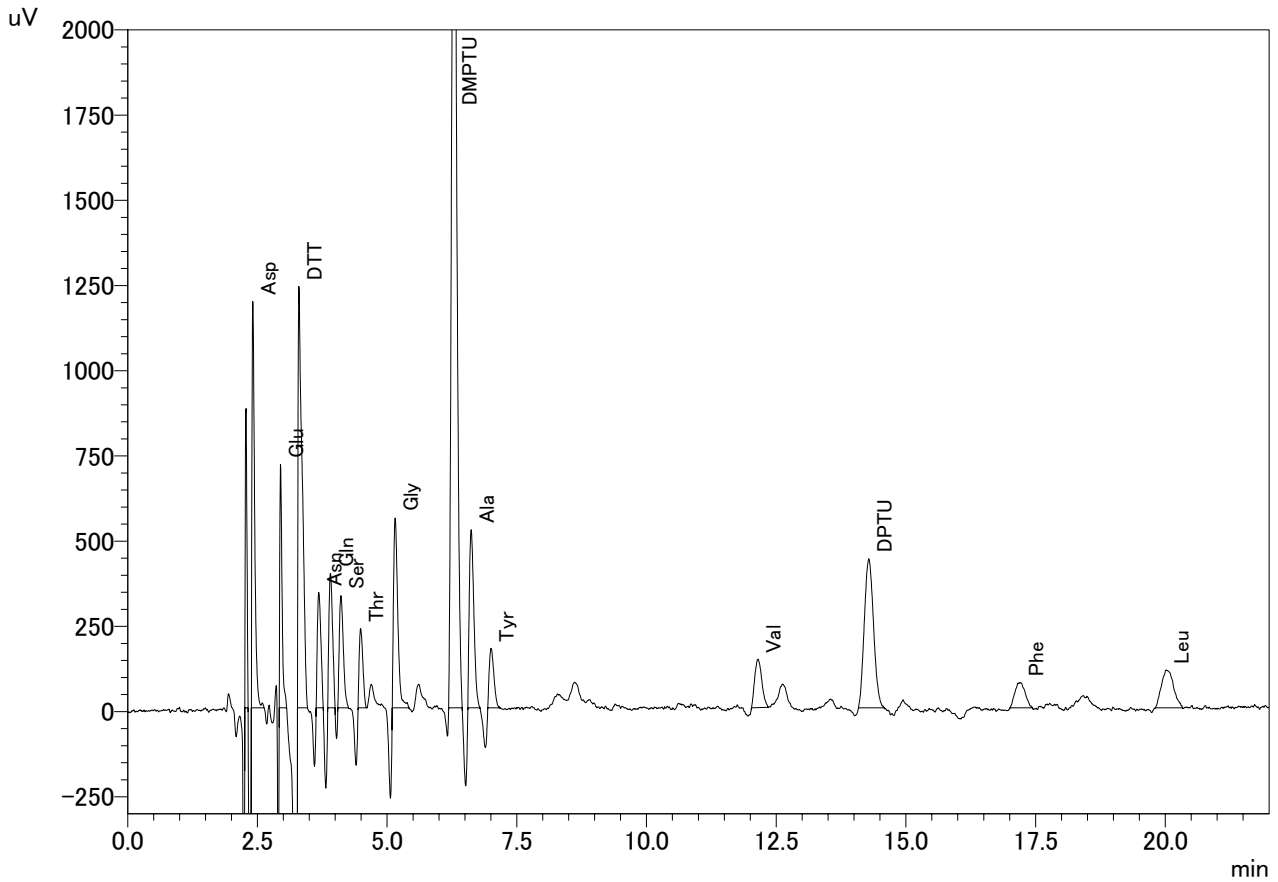

ピークテーブル  
 検出器A Ch1 269nm

| ピーク# | 化合物名  | 保持時間   | 面積    | 濃度 [pmol] |
|------|-------|--------|-------|-----------|
| 1    |       | 2.276  | 1979  |           |
| 2    | Asp   | 2.409  | 4280  | 5.695     |
| 3    | Glu   | 2.944  | 2151  | 2.850     |
| 4    | DTT   | 3.298  | 6750  |           |
| 5    | Asn   | 3.681  | 1613  | 2.088     |
| 6    | Gln   | 3.906  | 1927  | 2.411     |
| 7    | Ser   | 4.108  | 1777  | 2.534     |
| 8    | Thr   | 4.488  | 1135  | 1.528     |
| 9    | Gly   | 5.153  | 3151  | 4.938     |
| 10   | DMPTU | 6.285  | 19689 |           |
| 11   | Ala   | 6.618  | 3180  | 4.656     |
| 12   | Tyr   | 7.000  | 1087  | 1.610     |
| 13   | Val   | 12.147 | 1345  | 1.988     |
| 14   | DPTU  | 14.283 | 5398  |           |
| 15   | Phe   | 17.207 | 1021  | 1.667     |
| 16   | Leu   | 20.013 | 1800  | 2.781     |
| 合計   |       |        | 58285 |           |

データファイル : 120328\_Sample6\_D24.lcd  
サンプル名 : 120328\_Sample6  
メソッドファイル : 120328\_Sample6.LCM  
分析日時 : 2012/03/29 15:02:39  
バックグラウンドデータ : 120328\_Sample6\_D23.lcd

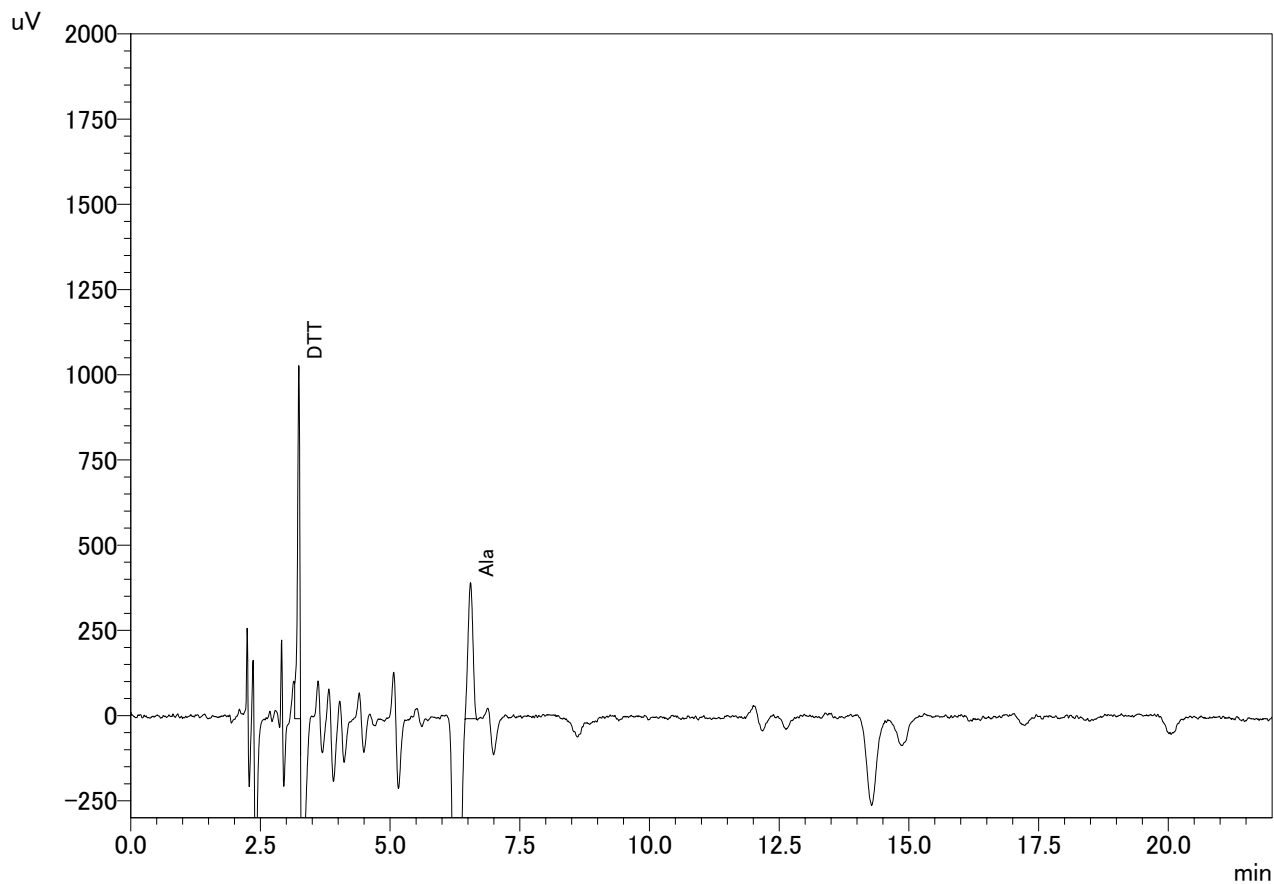

ピークテーブル

検出器A Ch1 269nm

| ピーク# | 化合物名 | 保持時間  | 面積   | 濃度 [pmol] |
|------|------|-------|------|-----------|
| 1    | DTT  | 3.239 | 3148 |           |
| 2    | Ala  | 6.547 | 2609 | 3.820     |
| 合計   |      |       | 5757 |           |



データファイル : 120328\_Sample6\_D25.lcd  
 サンプル名 : 120328\_Sample6  
 メソッドファイル : 120328\_Sample6.LCM  
 分析日時 : 2012/03/29 15:54:46  
 バックグラウンドデータ : 120328\_Sample6\_D24.lcd

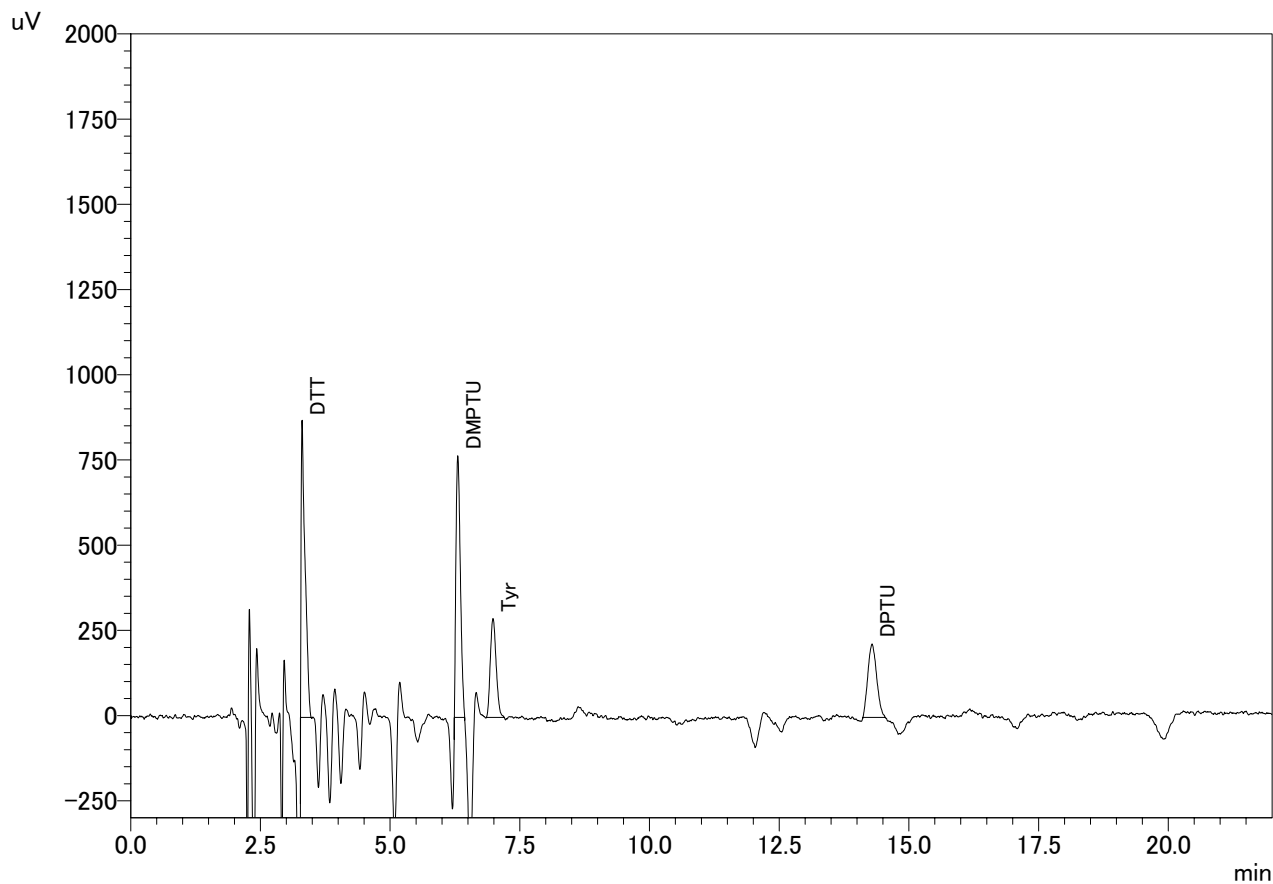

ピークテーブル

検出器A Ch1 269nm

| ピーク# | 化合物名  | 保持時間   | 面積    | 濃度 [pmol] |
|------|-------|--------|-------|-----------|
| 1    | DTT   | 3.301  | 4546  |           |
| 2    | DMPTU | 6.303  | 4540  |           |
| 3    | Tyr   | 6.981  | 2268  | 3.360     |
| 4    | DPTU  | 14.288 | 2535  |           |
| 合計   |       |        | 13889 |           |

データファイル : 120328\_Sample6\_D26.lcd  
サンプル名 : 120328\_Sample6  
メソッドファイル : 120328\_Sample6.LCM  
分析日時 : 2012/03/29 16:46:53  
バックグラウンドデータ : 120328\_Sample6\_D25.lcd

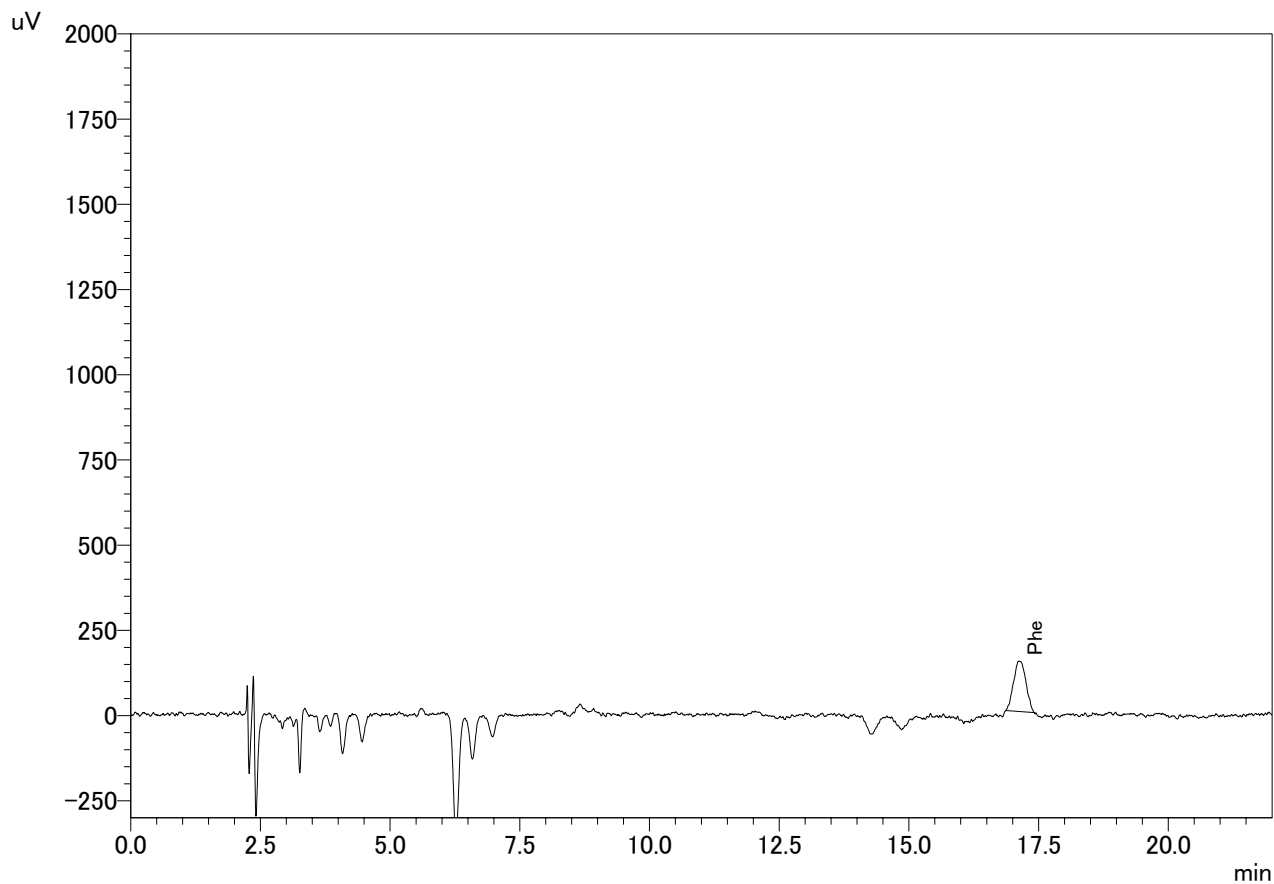

ピークテーブル  
検出器A Ch1 269nm

| ピーク# | 化合物名 | 保持時間   | 面積   | 濃度 [pmol] |
|------|------|--------|------|-----------|
| 1    | Phe  | 17.129 | 2447 | 3.994     |
| 合計   |      |        | 2447 |           |

データファイル : 120328\_Sample6\_D27.lcd  
サンプル名 : 120328\_Sample6  
メソッドファイル : 120328\_Sample6.LCM  
分析日時 : 2012/03/29 17:39:01  
バックグラウンドデータ : 120328\_Sample6\_D26.lcd

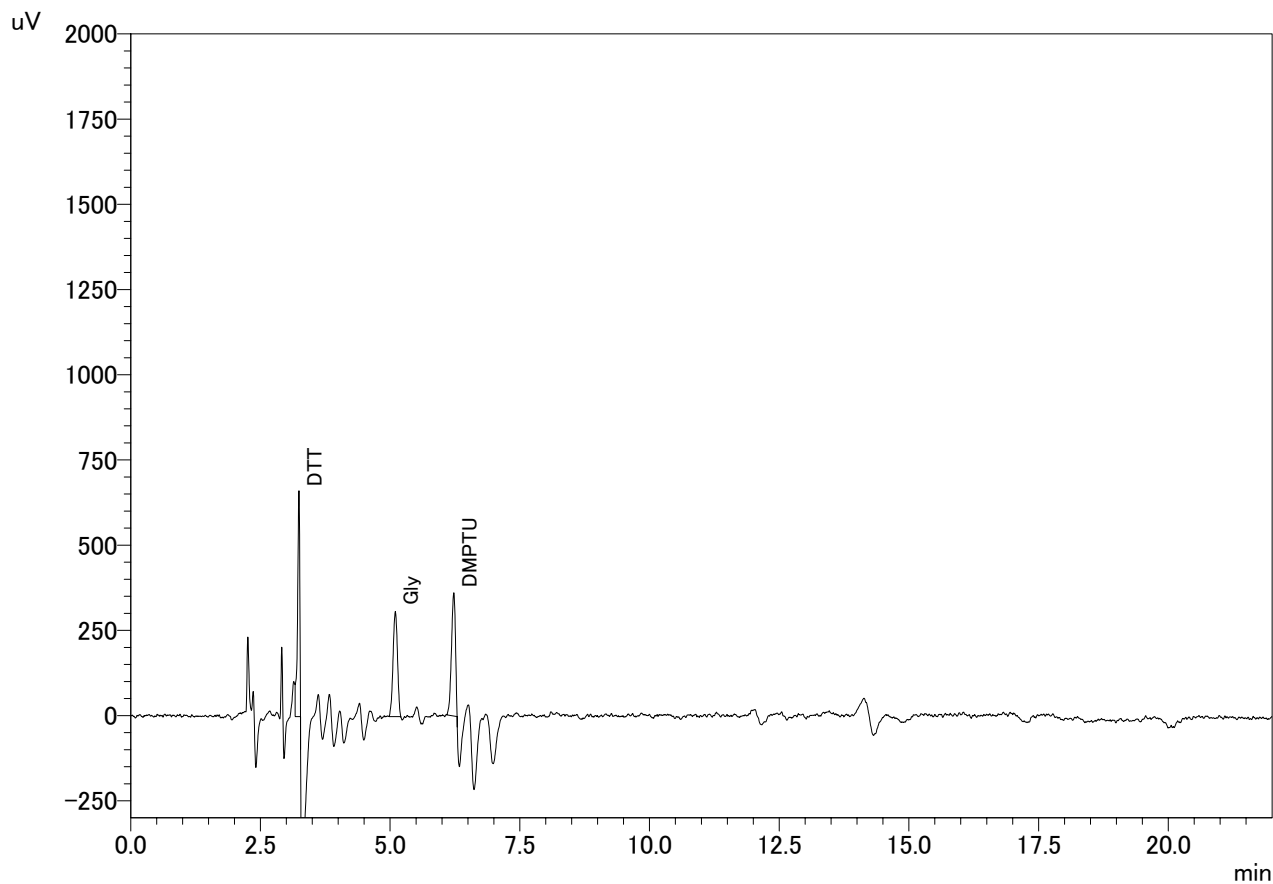

ピークテーブル

検出器A Ch1 269nm

| ピーク# | 化合物名  | 保持時間  | 面積   | 濃度 [pmol] |
|------|-------|-------|------|-----------|
| 1    | DTT   | 3.241 | 1959 |           |
| 2    | Gly   | 5.099 | 1825 | 2.860     |
| 3    | DMPTU | 6.226 | 1932 |           |
| 合計   |       |       | 5715 |           |

データファイル : 120328\_Sample6\_D28.lcd  
 サンプル名 : 120328\_Sample6  
 メソッドファイル : 120328\_Sample6.LCM  
 分析日時 : 2012/03/29 18:31:08  
 バックグラウンドデータ : 120328\_Sample6\_D27.lcd

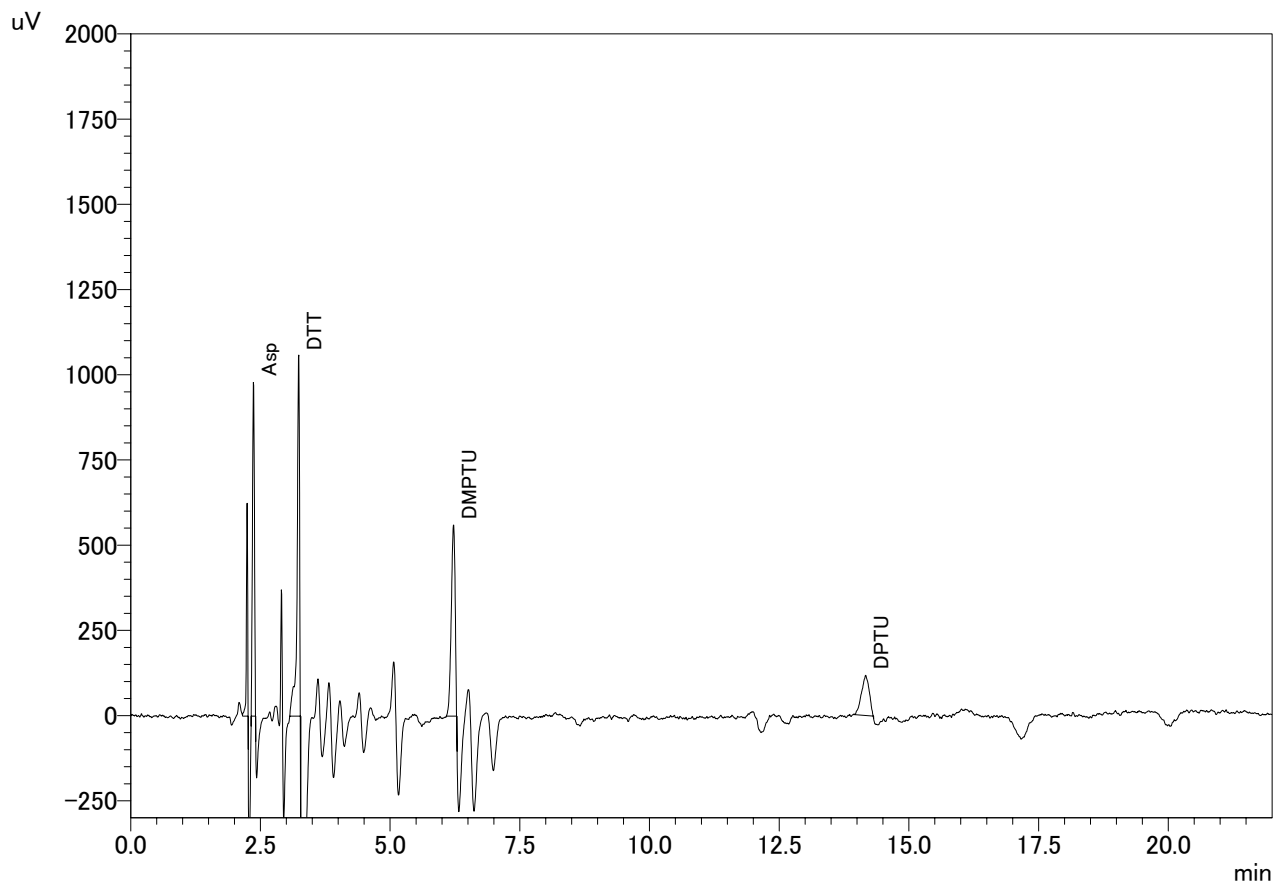

ピークテーブル

検出器A Ch1 269nm

| ピーク# | 化合物名  | 保持時間   | 面積    | 濃度 [pmol] |
|------|-------|--------|-------|-----------|
| 1    |       | 2.241  | 1007  |           |
| 2    | Asp   | 2.364  | 2611  | 3.474     |
| 3    | DTT   | 3.235  | 3467  |           |
| 4    | DMPTU | 6.220  | 2900  |           |
| 5    | DPTU  | 14.164 | 1216  |           |
| 合計   |       |        | 11201 |           |

データファイル : 120328\_Sample6\_D29.lcd  
サンプル名 : 120328\_Sample6  
メソッドファイル : Manipulation.lcm  
分析日時 : 2012/03/29 19:23:15  
バックグラウンドデータ : 120328\_Sample6\_D28.lcd

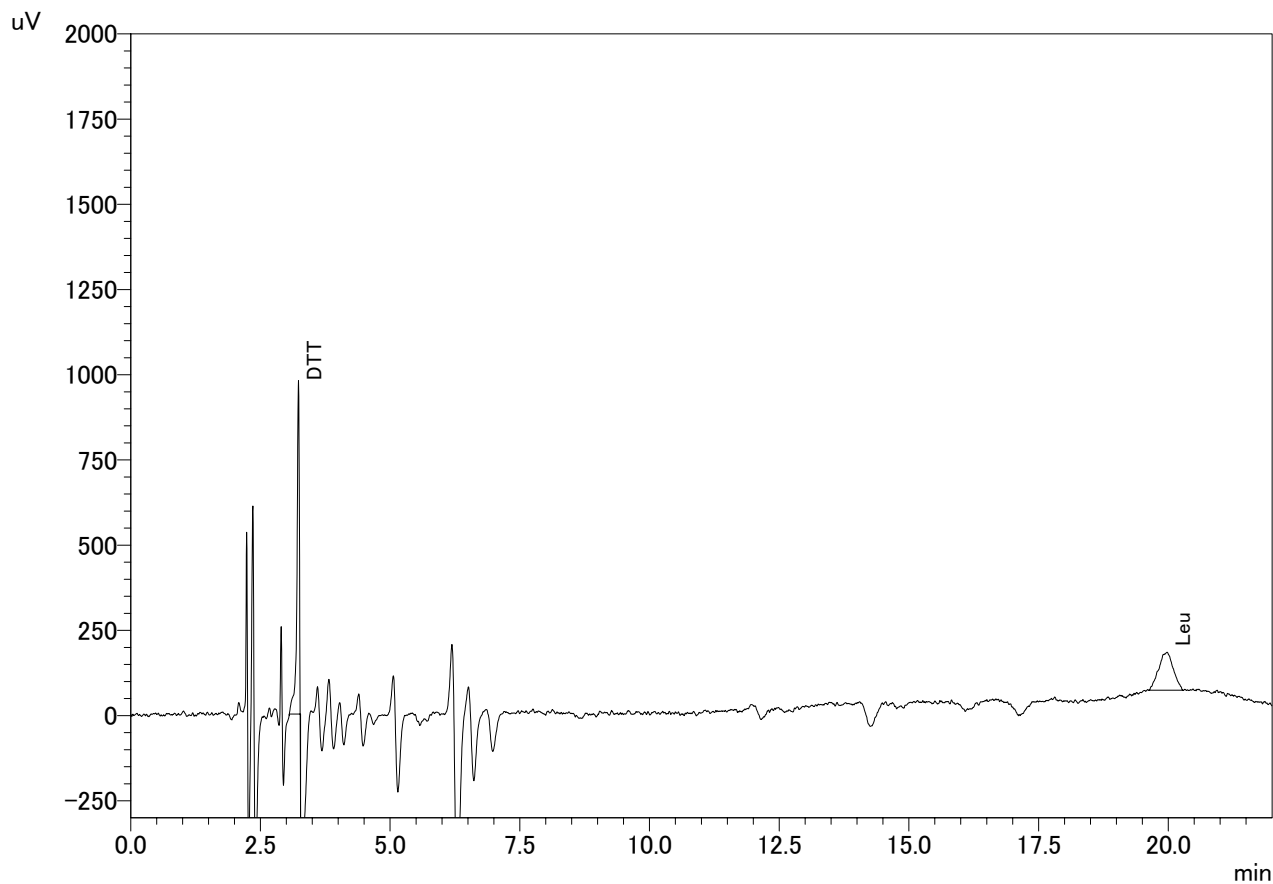

ピークテーブル  
検出器A Ch1 269nm

| ピーク# | 化合物名 | 保持時間   | 面積   | 濃度 [pmol] |
|------|------|--------|------|-----------|
| 1    | DTT  | 3.231  | 3170 |           |
| 2    | Leu  | 19.974 | 2186 | 3.376     |
| 合計   |      |        | 5356 |           |

データファイル : 120328\_Sample6\_D30.lcd  
 サンプル名 : 120328\_Sample6  
 メソッドファイル : 120328\_Sample6.LCM  
 分析日時 : 2012/03/29 20:15:23  
 バックグラウンドデータ : 120328\_Sample6\_D29.lcd

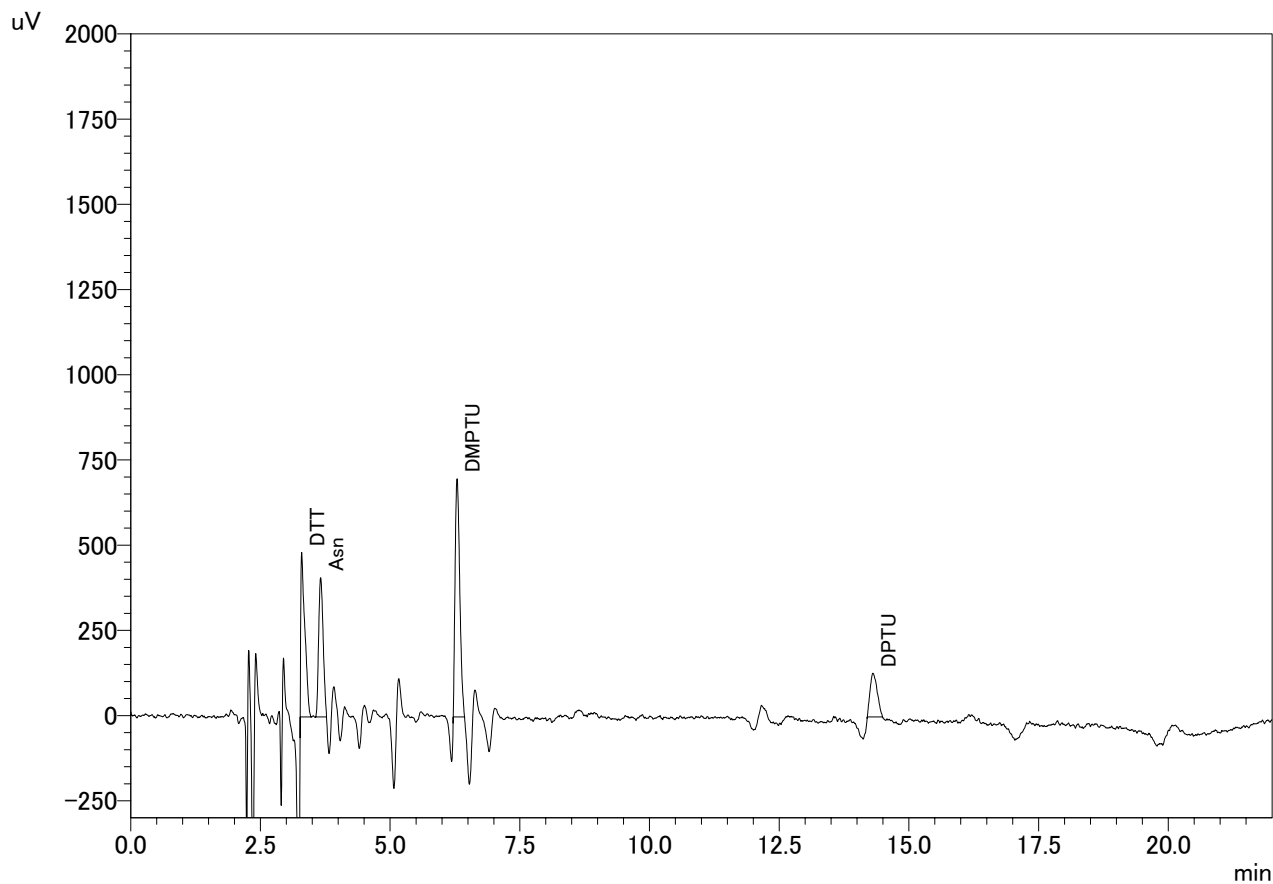

ピークテーブル

検出器A Ch1 269nm

| ピーク# | 化合物名  | 保持時間   | 面積    | 濃度 [pmol] |
|------|-------|--------|-------|-----------|
| 1    | DTT   | 3.293  | 2621  |           |
| 2    | Asn   | 3.659  | 2462  | 3.187     |
| 3    | DMPTU | 6.289  | 4367  |           |
| 4    | DPTU  | 14.304 | 1228  |           |
| 合計   |       |        | 10678 |           |

データファイル : 120328\_Sample6\_D31.lcd  
サンプル名 : 120328\_Sample6  
メソッドファイル : Manipulation.lcm  
分析日時 : 2012/03/29 21:07:30  
バックグラウンドデータ : 120328\_Sample6\_D30.lcd

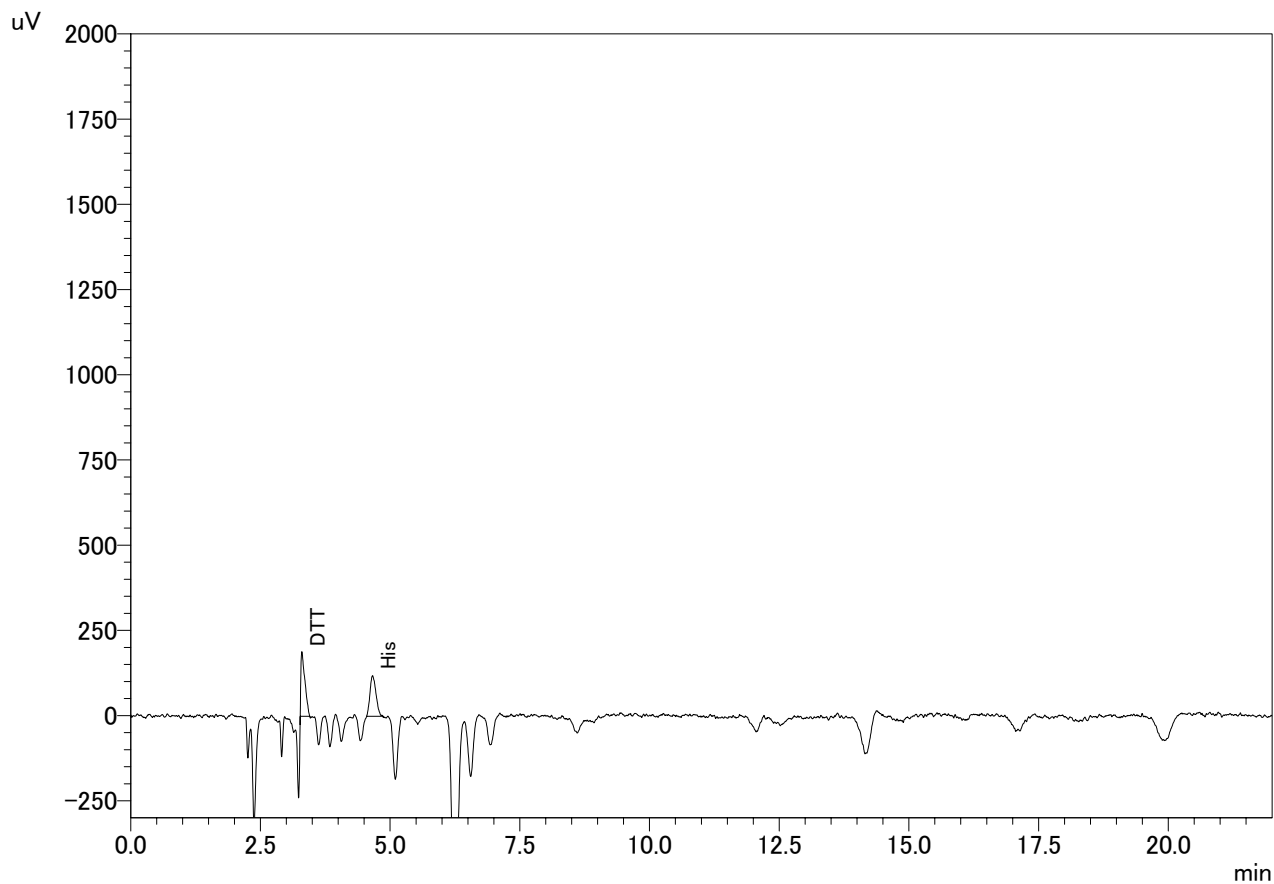

ピークテーブル  
検出器A Ch1 269nm

| ピーク# | 化合物名 | 保持時間  | 面積   | 濃度 [pmol] |
|------|------|-------|------|-----------|
| 1    | DTT  | 3.297 | 1023 |           |
| 2    | His  | 4.661 | 961  | 1.390     |
| 合計   |      |       | 1984 |           |

データファイル : 120328\_Sample6\_D32.lcd  
サンプル名 : 120328\_Sample6  
メソッドファイル : Manipulation.lcm  
分析日時 : 2012/03/29 21:59:37  
バックグラウンドデータ : 120328\_Sample6\_D31.lcd

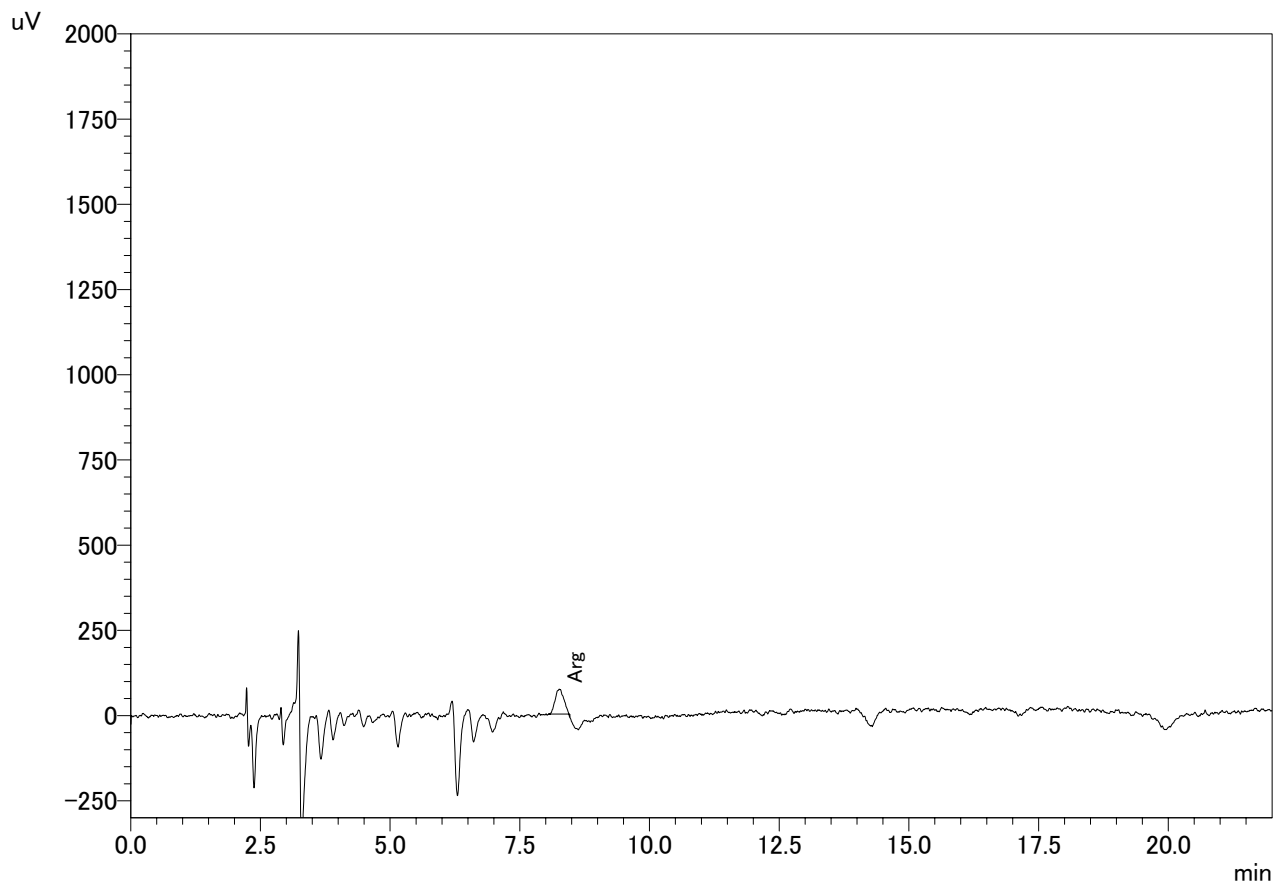

ピークテーブル  
検出器A Ch1 269nm

| ピーク# | 化合物名 | 保持時間  | 面積  | 濃度 [pmol] |
|------|------|-------|-----|-----------|
| 1    | Arg  | 8.258 | 851 | 1.197     |
| 合計   |      |       | 851 |           |



データファイル : 120328\_Sample6\_D33.lcd  
サンプル名 : 120328\_Sample6  
メソッドファイル : 120328\_Sample6.LCM  
分析日時 : 2012/03/29 22:51:45  
バックグラウンドデータ : 120328\_Sample6\_D32.lcd

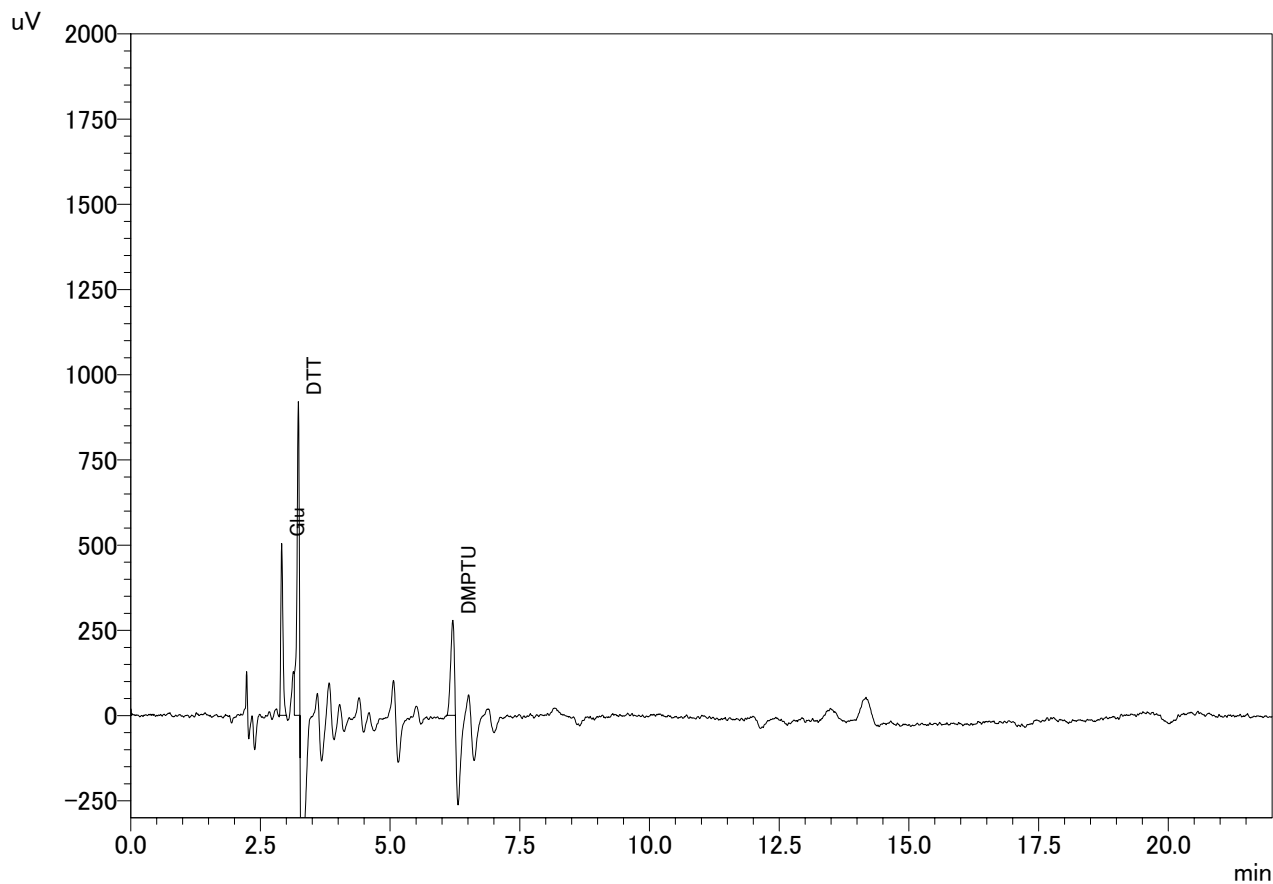

ピークテーブル

検出器A Ch1 269nm

| ピーク# | 化合物名  | 保持時間  | 面積   | 濃度 [pmol] |
|------|-------|-------|------|-----------|
| 1    | Glu   | 2.908 | 1438 | 1.905     |
| 2    | DTT   | 3.229 | 2791 |           |
| 3    | DMPTU | 6.206 | 1339 |           |
| 合計   |       |       | 5567 |           |
