# Supplementary material for: An HASApf–redoxin complex causing asymmetric catalytic oxidation via the regenerative formation of a reactive oxygen species
Source: Royal Society of Chemistry journal article supplement (doi:10.1039/c5dt01768h), 2015-01-01
Supplement: c5dt01768h2.pdf [file c5dt01768h2.pdf]

## Electronic Supplementary Information

# An HASApf-Redoxin Complex causing Asymmetric Catalytic Oxidation via the Regenerative Formation of a Reactive Oxygen Species

*Hiroyuki Nagaoka\**

Sanyo Shokuhin Co., Ltd. R & D, 555-4 Asakura, Maebashi, Gunma 371-0811, Japan

E-mail: [hnagaoka@sanyofoods.co.jp](mailto:hnagaoka@sanyofoods.co.jp), Tel: +81-27-220-3471, Fax: +81-27-220-3477

**Abbreviations:** HasApf: heme acquisition system A from *Pseudomonas fluorescens* Pf-5, ME: membrane-bound enzymes, PP: pea protein, DMSO: dimethyl sulfoxide, PP-gel: calcium-alginate gel containing PP, GA: glutaraldehyde, CMME: compound-modified ME, AGME: PEG (MW: 4000/1000 = 1/2)-aggregated ME, *S-1*: *S*-(+)-1-(6-methoxynaphthalen-2-yl)ethanol, *S-2*: *S*-(+)-1-(2-naphthyl)ethanol, ICP-AES: inductively coupled plasma-atomic emission spectroscopy, IC: ion chromatography. ESR: electron spin resonance, FTIR: Fourier-transform infrared spectroscopy, Fdx: ferredoxin.

## Table of Contents

|                                                                                |           |
|--------------------------------------------------------------------------------|-----------|
| <b>1. General procedure for reactions using CMME and AGME.....</b>             | <b>S2</b> |
| <b>2. Gel-filtration for given a single band from supernatant 2.....</b>       | <b>S3</b> |
| <b>3. SDS-page for given a single band from supernatant 2.....</b>             | <b>S5</b> |
| <b>4. FTIR/X-ray spectrums for a sulfate (iron) heme with dried forms.....</b> | <b>S5</b> |
| <b>5. Chromatograms of the N-terminal amino-acid sequence of band-F.....</b>   | <b>S8</b> |
| <b>6. References.....</b>                                                      | <b>S8</b> |

## 1. General procedure for reactions using CMME and AGME

A calibration curve configured, the chromatograms of the *rac-1* biotransformation with CMME, and the raw data of the *rac-1* biotransformation with CMME/ME suspension were shown. Enantiomeric excess (ee) values, chemical yield ratio (% yield)/conversion ratio of all compounds were obtained from chiral HPLC analysis.

### 1-1. Calibration curve configured using HPLC.

The ee was calculated for either *rac-1* (0.8 mM or 1.2 mM) or *rac-2* (0.8 mM or 1.2 mM), which were separated with either a Daicel Chiralcel OB-H column ((S)-isomer/(R)-isomer/product ketone = 7.8/8.8/11.6 min) or a Daicel Chiralpak AS-H column ((S)-isomer/(R)-isomer/product ketone = 7.5/8.25/9.5 min) connected to an HPLC LC-10A system (Shimadzu). Analytical conditions were as follows: mobile phase, n-hexane/IPA: 9/1, flow rate: 1.0 mL/min, temperature: 30 °C, wavelength: UV 254 nm. The stereochemistry of the isolated optically active alcohol was identified by comparing the values (+ or -) for the specific rotation detected using a polarimeter, as done previously.<sup>1</sup>

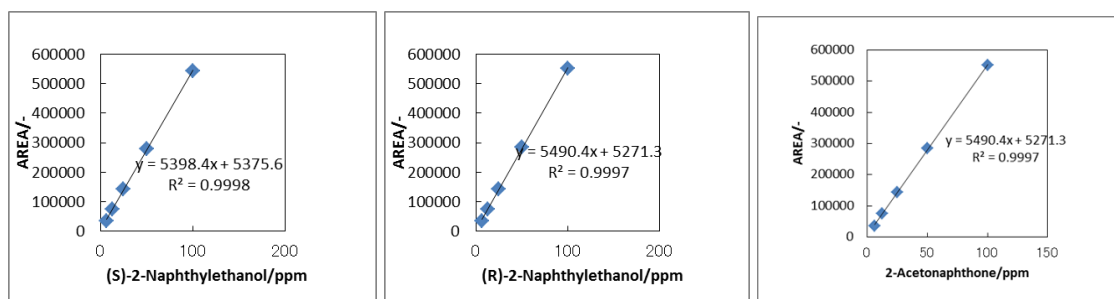

| Conc./ppm | (R)-2/abs <sup>‡</sup> | (S)-2/abs <sup>‡</sup> | ketone/abs <sup>†</sup> |
|-----------|------------------------|------------------------|-------------------------|
| 3.125     | 18408                  | 18403                  | -                       |
| 6.25      | 34455                  | 34671                  | 64884                   |
| 12.5      | 69207                  | 69837                  | 129479                  |
| 25        | 133042                 | 134274                 | 256966                  |
| 50        | 263249                 | 267577                 | 509690                  |
| 100       | 515506                 | 524152                 | 983200                  |

<sup>‡</sup>Absorbance of HPLC analysis, <sup>†</sup>Average

## 1-2. Data of chromatograms

The time course/chromatograms of the asymmetric oxidation of *rac*-1 (1.2 mM) using a CMME (20 mg) was monitored and quantitatively analyzed under the suggested conditions.<sup>1</sup>

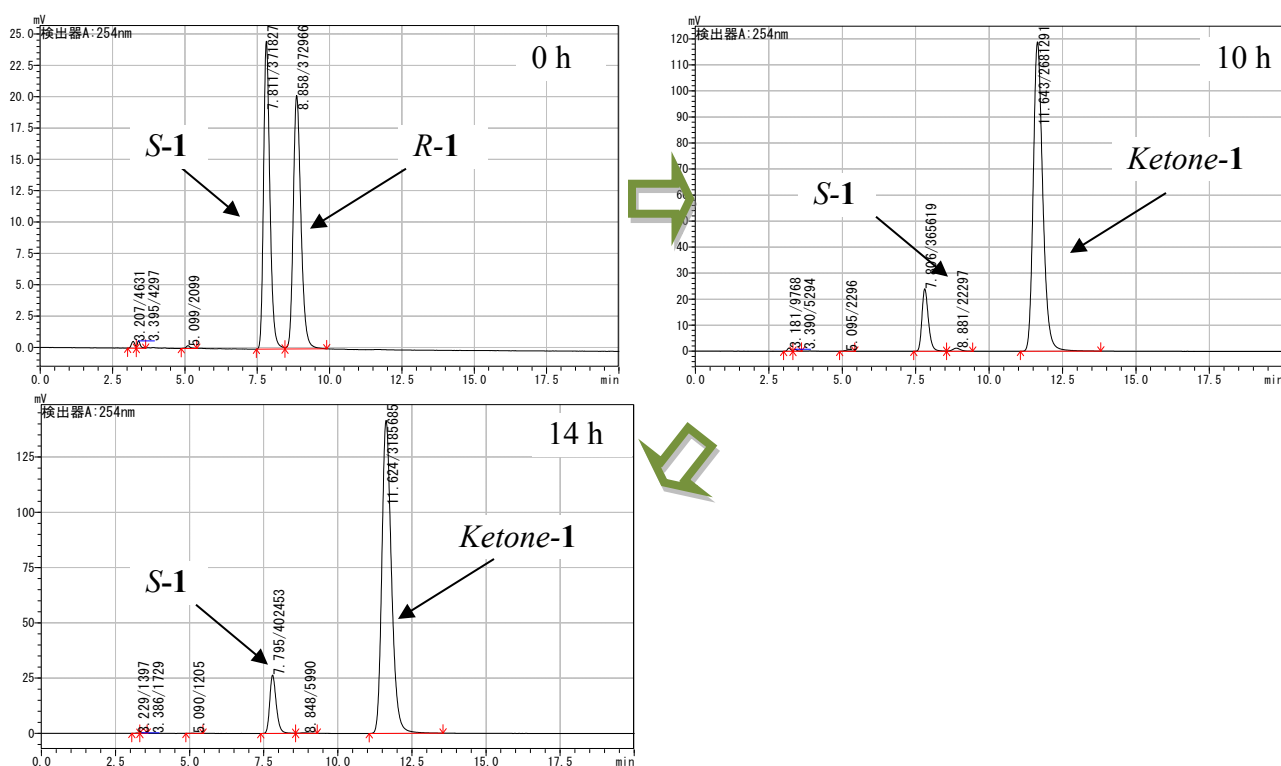

| Time/h | S-1/Abs <sup>‡</sup> | R-1/abs <sup>‡</sup> | Ketone/Abs <sup>‡</sup> | %ee    | Avg <sup>†</sup> (%ee) |
|--------|----------------------|----------------------|-------------------------|--------|------------------------|
| 0      | 384592               | 386537               | -                       | 0.252  | 0.20                   |
|        | 371827               | 372966               | -                       | 0.152  |                        |
| 10     | 341321               | 27703                | 2437138                 | 84.985 | 86.74                  |
|        | 365619               | 22297                | 2681291                 | 88.50  |                        |
| 14     | 421760               | 2286                 | 3429781                 | 98.92  | 99.17                  |
|        | 402453               | 1190                 | 3185685                 | 99.41  |                        |

<sup>‡</sup>Absorbance of HPLC analysis, <sup>†</sup>Average

## 2. Gel-filtration for given a single band-F from many band-A in SDS-PAGE

To determine the nature of the redox protein catalyzing asymmetric oxidation, the PP gel-suspension (10 mL) eluted from the PP-gel, which was incubated for 48 h, was first separated into 60 fractions (acquired in 18 mm test tubes with 3.0 mL portions in each tube) using a gel-filtration system. These were determined using a ÄKTA explorer 10S system. Sample (10 mL or 2 mL) was injected onto a

HiLoad16/60 Superdex 200 pg column at 4 °C. Conductivity-**brown**, 280 nm-**blue**, 254 nm-**pink**, and 340 nm-**red**.

## 2-1. Data of Gel-filtration chromatograms <sup>S1,2</sup>

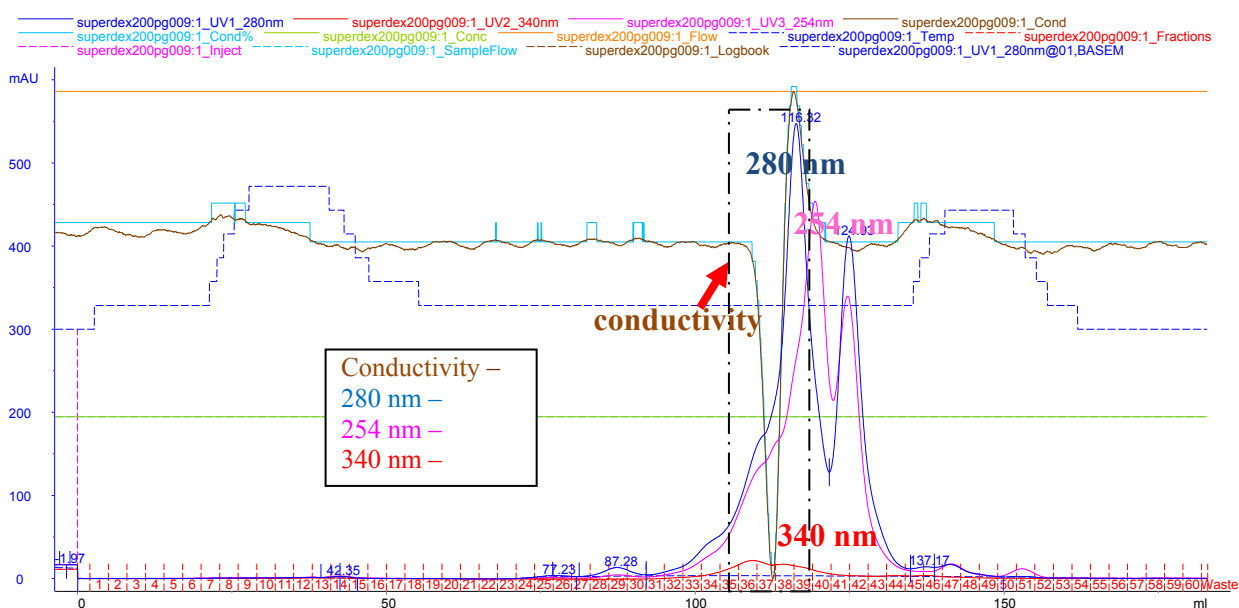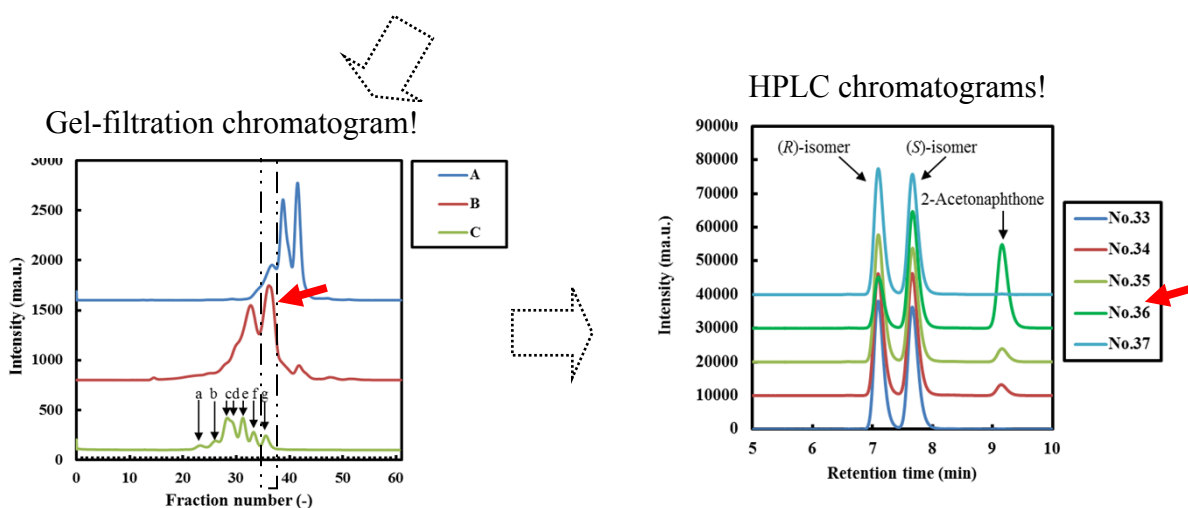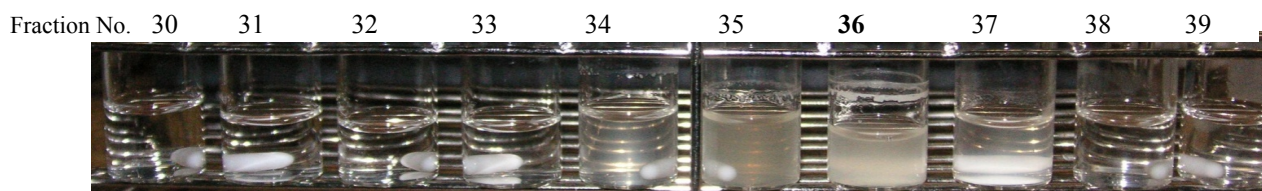

Gel-filtration chromatogram: (–A) the supernatant of the ME suspension acquired by centrifugation, (–B) the supernatant of the 5% PP aqueous suspension acquired by centrifugation, (–C) molecular standards: a, ferritin (440 kDa); b, aldolase (158 kDa); c, conalbumin (75 kDa); d, ovalbumin (44 kDa); e, carbonic anhydrase (29 kDa); f, ribonuclease A (13.7 kDa); g, aprotinin (6.5 kDa).

HPLC chromatograms of each fraction (3.0 mL) after the addition of 0.48 mL of a substrate solution containing rac-2 (0.8 mM) and DMSO (1.03% (v/v)) and incubation of the resulting mixture at 40 °C for 48 h with magnetic stirring at 700 rpm. After reactions, the mixture was extracted by Hexame due to measure both chemical yield and % ee.

**Figure S1.** The gel-filtration system was used as PP-HasA purification: The PP gel-suspension (10 mL) purified applied by filtration using Vivaspin 2-10K (GE, MWCO =10 kDa) was significantly monitored

for line in conductivity: the target PP-HasA fraction can be collected in red between 110 ml and 120 ml (namely fraction 34-37, especially fraction 36).

## 2-1. Data of SDS-PAGE

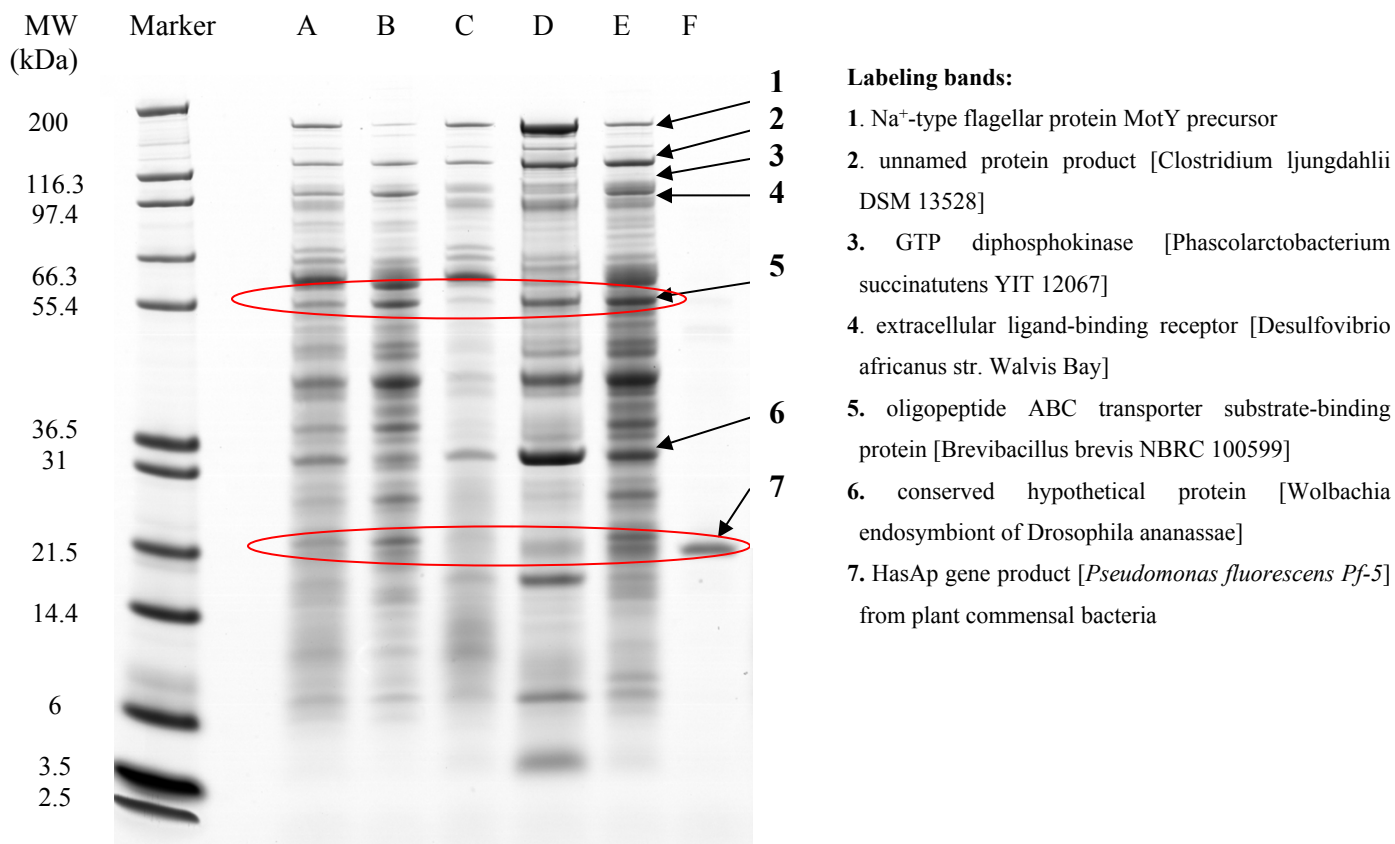

**Figure S2.** SDS-PAGE of samples<sup>S1,S2</sup>: (A) Eluant from the supernatant 1 of the PP gel (10  $\mu$ L), (B) Aqueous suspension of the sample A precipitate acquired via centrifugation (10  $\mu$ L), (C) Sample A supernatant acquired via centrifugation (10  $\mu$ L), (D) Aqueous suspension acquired via the centrifugation of the sample C precipitate generated using 30% (w/v) saturated (NH<sub>4</sub>)<sub>2</sub>SO<sub>4</sub> (10  $\mu$ L), (E) Aqueous suspension acquired via the centrifugation of the sample A precipitate generated using 30% (w/v) saturated (NH<sub>4</sub>)<sub>2</sub>SO<sub>4</sub> (10  $\mu$ L), (F) Fraction 36 obtained via gel-filtration chromatography using a HITEC-CR20G (Hitachi) system at 10,000 rpm (10 min).

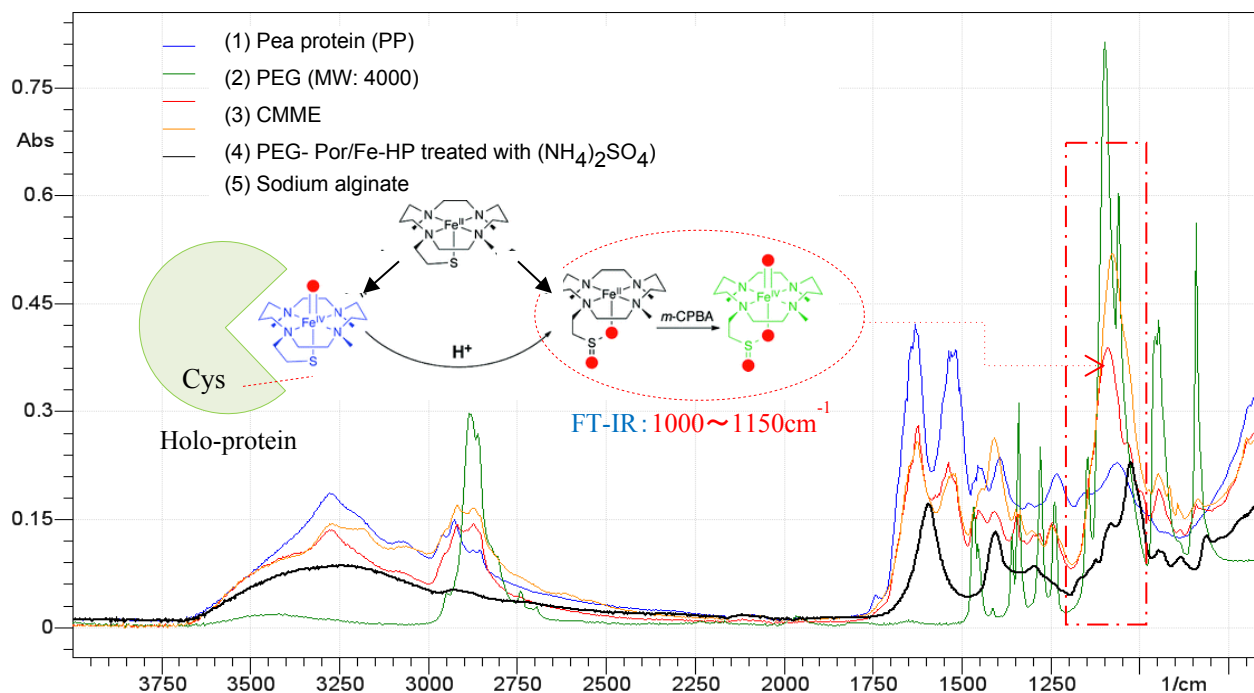

**Figure S3.** Differences in the content of functional groups among four samples (1) pea protein, (2) PEG (MW: 4000), (3) CMME, (4) PEG-ME treated with 30% (w/v) aqueous  $(\text{NH}_4)_2\text{SO}_4$ , and (5) sodium alginate: The red circles indicate oxygen atoms. The peak around  $1000\text{--}1250\text{ cm}^{-1}$  is attributed to a sulfate ion, which is thought to be the absorption in the PP gel under aeration.

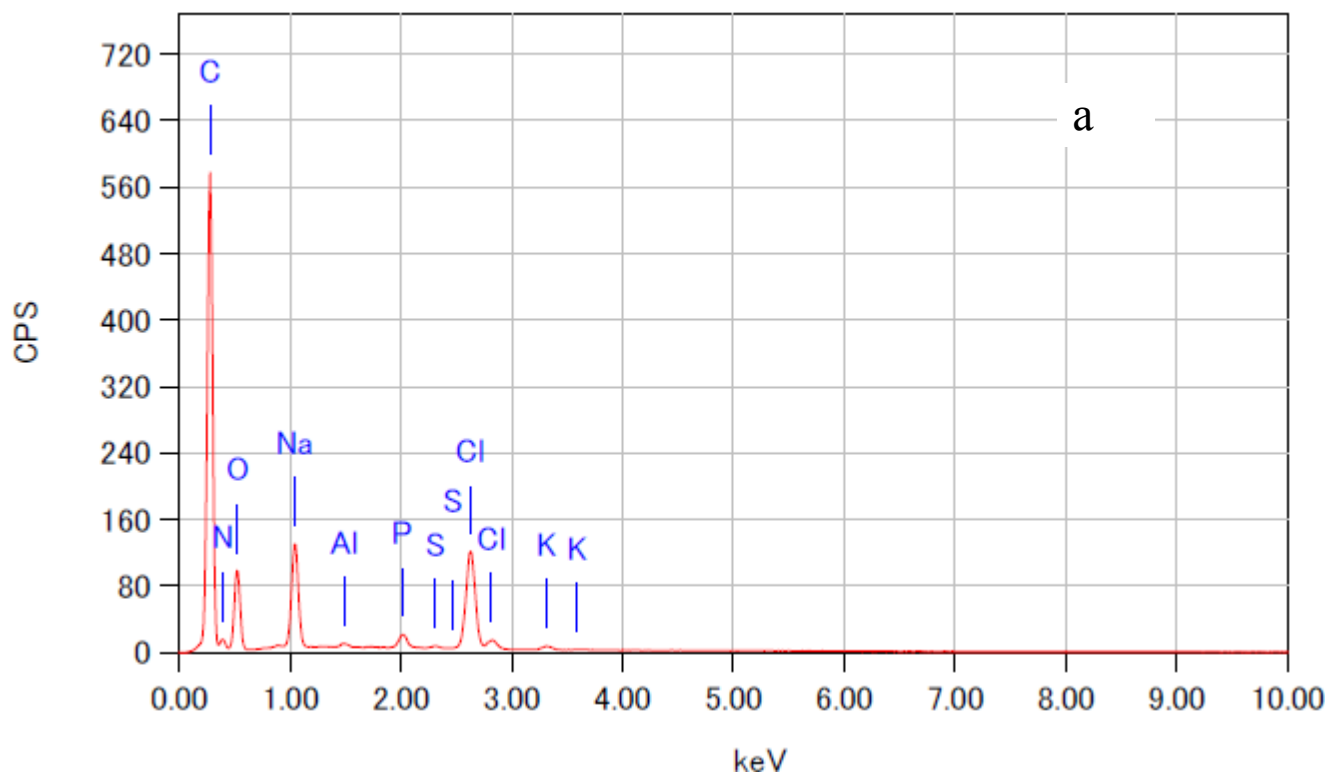

| Elements | KeV   | wt%   | $\sigma$ | atom% | K       |
|----------|-------|-------|----------|-------|---------|
| C K      | 0.277 | 83.09 | 0.07     | 89.67 | 75.7112 |
| N K      | 0.392 | 1.55  | 0.01     | 1.43  | 0.8009  |
| O K      | 0.525 | 5.60  | 0.02     | 4.54  | 4.0924  |
| Na K     | 1.041 | 3.78  | 0.02     | 2.13  | 6.6494  |
| Al K     | 1.486 | 0.12  | 0.00     | 0.06  | 0.2053  |
| P K      | 2.013 | 0.59  | 0.01     | 0.25  | 1.2138  |
| S K      | 2.307 | 0.09  | 0.00     | 0.04  | 0.1881  |
| Cl K     | 2.621 | 4.91  | 0.02     | 1.80  | 10.5824 |
| K K      | 3.312 | 0.27  | 0.01     | 0.09  | 0.5565  |

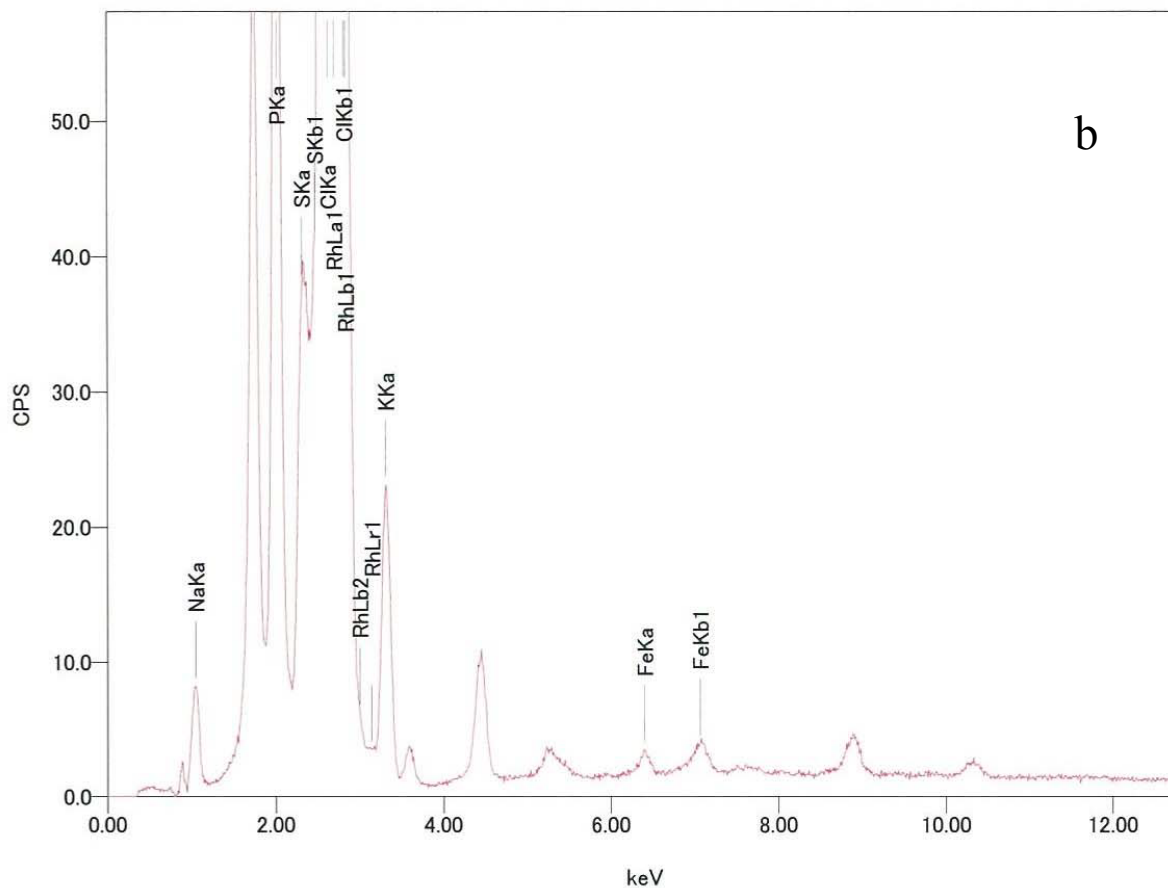

| Minerals | wt%     | mol%    | $3\sigma$ | Intensity | K ratio   | K |
|----------|---------|---------|-----------|-----------|-----------|---|
| 15 P     | 5.6710  | 5.9647  | 0.6176    | 129802    | 0.0047077 | K |
| 16 S     | 0.8657  | 0.8796  | 0.2266    | 28703     | 0.0008160 | K |
| 17 Cl    | 70.6465 | 64.9184 | 0.4726    | 1064404   | 0.0405031 | K |
| 19 K     | 6.9008  | 5.7501  | 1.2482    | 35533     | 0.0017630 | K |
| 26 Fe    | 0.0802  | 0.0468  | 0.1366    | 3227      | 0.0000470 | K |

**Figure 4** (a) Element analysis for HasApf dried by using energy dispersive X-ray spectroscopy (JSM-6610LA; Voltage (15 kV), Current (1.0 nA), and Live time (114 sec)), and (b) Mineral analysis for HasApf dried by using radiation induced X-ray emission (JSX-3100R2; Voltage (50 kV), Current (1.0 mA), Live time (100 sec), and Atmosphere (Vacuum))

### 3. Chromatograms of the N-terminal amino-acid sequence of band-F

Precise analysis of the N-terminal amino acid sequence (protein sequencing) was accomplished using the protein sequencer PPSQ-21A (Shimadzu) with single band 7 of the PX-redox protein in sample F monitored by SDS-Page.

#### 3-1. Results of both N-terminal amino-acid sequence and its BLAST query sequence analysis<sup>S1,2</sup>

**Table S1.** Results of a BLAST query sequence analysis based on the N-terminal amino-acid sequence identified from fraction 36 (band 7)

---

#### Cycle No. for fraction 36 (band 7)

#### N-terminal amino-acid sequence identified (33 residues)

1. M S X<sup>a</sup> S I S Y S T X<sup>b</sup> Y A T N T V A Q Y L X<sup>a</sup> D W X<sup>b</sup> A Y F G D L  
30. N H R E

#### Cycle No. for YP 262445.1<sup>c</sup>

#### Full length gene and Protein sequence based on a BLAST query sequence analysis

|      |                                                                                   |                                                                                   |                                                                                   |
|------|-----------------------------------------------------------------------------------|-----------------------------------------------------------------------------------|-----------------------------------------------------------------------------------|
| 1.   | M S I S I S Y S A T                                                               | Y G G N T V A G Y L                                                               | T D W S A Y F G D V                                                               |
|      | atg agc att tcg atc tct tac agc gct acc                                           | tac ggc ggt aat act gtt gcg caa tac ctg                                           | act gac tgg tcg gcc tac ttc ggc gac gtc                                           |
| 30.  | N <span style="border: 1px solid black; padding: 0 2px;">H</span> R P G E V V D G | T N T G G F N P G P                                                               | F D G T Q Y A I K S                                                               |
|      | aac cac cgc cca ggc gaa gtg gtc gac ggc                                           | acc aac acc ggt ggc ttc aac ccg ggc ccg                                           | ttc gac ggc acc cag tac gcc atc aag agc                                           |
| 60.  | T A S D A A F V A D                                                               | G N L H <span style="border: 1px solid black; padding: 0 2px;">Y</span> T L F S N | P S <span style="border: 1px solid black; padding: 0 2px;">H</span> T L W G S V D |
|      | acc gcc agt gac gcg gcc ttc gtc gcc gac                                           | ggc aac ctg cac tac acc ctg ttc agc aac                                           | ccg agc cac acc ctg tgg ggc tcg gtc gac                                           |
| 90.  | T I S L G D T L A G                                                               | G S G S N Y N L V S                                                               | Q E V S F T N L G L                                                               |
|      | act atc tcc ctg ggc gac acc ctc gcc ggt                                           | ggt tcg ggc agc aac tac aac ctg gtc agc                                           | cag gaa gtc agc ttc acc aac ctg ggc ctc                                           |
| 120. | N S L K E E G R A G                                                               | E V H K V V Y G L M                                                               | S G D S S A L A G E                                                               |
|      | aac agc ctg aag gaa gaa ggc cgt gca ggc                                           | gaa gtc cac aag gtg gtc tac gcc ctg atg                                           | agt ggc gac agc tcg gcg ctg gcc ggc gag                                           |
| 150. | I D A L L K A I D P                                                               | S L S V N S T F D D                                                               | L A A A G V A H V N                                                               |
|      | atc gat gcc ctg ctc aag gcg atc gac cca                                           | agc ctg tcg gtc aac tcc acc ttc gac gac                                           | ctg gcc gct gct ggc gtt gct cac gtc aac                                           |
| 180. | P A A A A A D V G                                                                 | L V G V Q D V A Q D                                                               | W A L A A                                                                         |
|      | ccg gct gcc gca gcc gct gcc gat gtt ggc                                           | ctg gtc ggt gtc cag gac gtc gcc cag gac                                           | tgg gcg ctg gcc gcc                                                               |

X<sup>a</sup>: may be Cys (C) but not detected, X<sup>b</sup>: many amino acids were detected.

<sup>c</sup>YP 262445.1: the accession hit on the query sequence was limited between the query coverage (>93%) and E value (2e-11), a 20.853 Da HasAp gene product [hemophore: *Pseudomonas fluorescens Pf-5*] from plant commensal bacteria, which can inhibit the rhizosphere and produce secondary metabolites that suppress soil-borne plant pathogens.

Red amino acids indicate “hits” between fraction 36 and YP 262445.1<sup>c</sup>.

Squares indicate the heme-binding site: His-32 (bearing loop), Tyr-75 (axial heme ligand), and His-83 (hydrogen ligand).

Protein sequence based on a BLAST query sequence analysis of Cycle No. for YP 262445.1 is available on NCBI resource: <http://www.ncbi.nlm.nih.gov/protein/70732682> and the Full length gene sequences on PATRIC: VBIPseFlu72549\_5489: <http://patricbr.vbi.vt.edu/portal/portal/patric/Feature?cType=feature&cId=19880237>.

---

#### References

(S1) Nagaoka, H. *ACS Catal.* **2014**, 4, 553–565.

(S2) Nagaoka, H. *RSC Adv.* **2014**, 4, 16333–16344.
